# Supplementary material
Source: PubMed Central journal article supplement (PMC8211389)
Supplement: NIHMS1679786-supplement-supinfo.pdf [file NIHMS1679786-supplement-supinfo.pdf]

# Supplementary Materials for “Improved Generalized Raking Estimators to Address Dependent Covariate and Failure-Time Outcome Error”

Eric J. Oh<sup>\*1</sup>, Bryan E. Shepherd<sup>2</sup>, Thomas Lumley<sup>3</sup>, Pamela A. Shaw<sup>1</sup>

<sup>1</sup>University of Pennsylvania, Perelman School of Medicine  
Department of Biostatistics, Epidemiology, and Informatics

<sup>2</sup>Vanderbilt University School of Medicine  
Department of Biostatistics

<sup>3</sup>University of Auckland  
Department of Statistics

## Appendix A: Properties of the proposed raking estimators

### Regularity conditions for asymptotic normality

The following conditions are required for  $\sqrt{N}(\hat{\beta} - \beta_0)$  to be asymptotically normal, where  $\hat{\beta}$  represent the proposed raking estimators. Note that here we only give intuitive statements of the conditions for simplicity; the fully technical statements of the conditions can be found in Saegusa and Wellner (2013).

1. The auxiliary variables  $A$  are not concentrated at 0 and has bounded support
2.  $g$  is a strictly increasing continuously differentiable function that is bounded above and below by constants
3.  $\dot{g}$ , the derivative of  $g$ , exists and is bounded below by 0 and above by a constant
4.  $E(A^{\otimes 2})$  is finite and positive definite
5. The solution to the raking estimating equation (2) is consistent for  $\beta_0$
6. For  $\beta$  in a neighborhood of  $\beta_0$ , the partial score equations are contained in a Donsker class, which has an integrable envelope
7. The random map association with the raking estimation equation (2) has a continuously invertible Fréchet derivative

---

\*Corresponding author: ericoh@penncmedicine.upenn.edu

Conditions (1) and (4) are satisfied for our estimators by our selection of the auxiliary variables as influence functions. Conditions (2) and (3) are satisfied for  $g_i = \exp(\hat{\lambda}' A_i)$ , see Deville and Särndal (1992) for details. Condition (5) is shown to be satisfied in the Supplementary Materials of Saegusa and Wellner (2013). Conditions (6) and (7) are shown to be satisfied for the Cox proportional hazards model in Van der Vaart (2000), Section 25.12.

## Lack of bias from imputing auxiliary variables

Assume that the outcome model is correctly specified so that under the model,

$$E[\psi(\beta_0)] = 0 \text{ and } E\left[\frac{R}{\pi}\psi(\beta_0)\right] = 0.$$

Consider a calibration procedure using the auxiliary variables  $A(\alpha)$ , where  $\alpha = (\eta, \omega, \theta)$  are the parameters of the phase one working models, with estimators  $\hat{\alpha}$  and limiting value  $\alpha^*$ . For the purpose of demonstrating the lack of bias utilizing  $\hat{\alpha}$  in calibration, it is sufficient to consider linear calibration which is known to be asymptotically equivalent to generalized raking.

Define the estimating equation

$$\bar{\psi}(\beta; \alpha, \gamma) = \sum_{i=1}^N \frac{R_i}{\pi_i} (\psi_i(\beta) - \gamma A_i(\alpha)) + \sum_{i=1}^N \left(1 - \frac{R_i}{\pi_i}\right) \gamma A_i(\alpha).$$

The linear calibration estimator is identical to the estimator obtained by solving

$$\bar{\psi}(\beta; \hat{\alpha}, \hat{\gamma}) = 0$$

where  $\hat{\gamma}$  is obtained by the design-weighted regression of  $\psi_i$  on  $A_i$ . For any fixed  $\alpha$  and  $\gamma$ ,  $\gamma A(\alpha)$  does not depend on phase two data, and it is easy to see that

$$E[\bar{\psi}(\beta; \alpha, \gamma)] = 0$$

Now consider the linear calibration estimator with nuisance parameter estimates  $\hat{\alpha}$  and  $\hat{\gamma}$ . Theorem 5.31 in Van der Vaart (2000) shows that the limiting distribution of  $\hat{\beta}$  from solving such an estimating equation depends on  $\hat{\alpha}$  and  $\hat{\gamma}$  through the so-called ‘drift term’. Specifically, the ‘drift term’ in this setting is  $\sqrt{n}E[\bar{\psi}(\beta; \hat{\alpha}, \hat{\gamma})]$  and we want to show it is  $o_p(1)$ . To do so, we can expand around  $\alpha^*$  and  $\gamma^*$  to obtain:

$$E[\bar{\psi}(\beta; \hat{\alpha}, \hat{\gamma})] = (\hat{\alpha} - \alpha^*) \frac{\partial}{\partial \alpha} E[\bar{\psi}(\beta_0; \alpha, \gamma^*)] \Big|_{\alpha=\alpha^\dagger} + (\hat{\gamma} - \gamma^*) \frac{\partial}{\partial \gamma} E[\bar{\psi}(\beta_0; \alpha^*, \gamma)] \Big|_{\gamma=\gamma^\dagger}$$

where  $\alpha^\dagger$  is between  $\alpha$  and  $\hat{\alpha}$  and  $\gamma^\dagger$  is between  $\gamma$  and  $\hat{\gamma}$ . The two derivatives are identically zero, so the drift term is zero. Thus, as long as  $(\hat{\alpha}, \hat{\gamma}) \xrightarrow{p} (\alpha^*, \gamma^*)$  the limiting distribution of  $\hat{\beta}$  depends only on  $(\alpha^*, \gamma^*)$ . For our proposed estimators, we fit standard regression models to obtain  $\hat{\alpha}$  and  $\hat{\gamma}$ , which are consistent for  $\alpha^*$  and  $\gamma^*$  and therefore satisfy the conditions to yield no bias when used for calibration or raking.

## Appendix B: Misclassification metrics for simulations

Table 1: The sensitivity (Sens), specificity (Spec), positive predictive value (PPV), and negative predictive value (NPV) for the event indicator generated for error scenarios 1, 2, and 3 in the simple random sampling simulations.

| $\beta_z$ | % Cens | $\beta_x$ | Sens  | Spec  | PPV   | NPV   |
|-----------|--------|-----------|-------|-------|-------|-------|
| log(0.5)  | 50     | log(1.5)  | 0.465 | 0.947 | 0.878 | 0.684 |
|           |        | log(3)    | 0.479 | 0.948 | 0.893 | 0.669 |
|           | 75     | log(1.5)  | 0.672 | 0.905 | 0.693 | 0.897 |
|           |        | log(3)    | 0.705 | 0.889 | 0.659 | 0.908 |
|           | 90     | log(1.5)  | 0.822 | 0.820 | 0.330 | 0.977 |
|           |        | log(3)    | 0.819 | 0.796 | 0.294 | 0.977 |

Table 2: Misclassification generation process for the sampling design comparison simulations. The sensitivity (Sens), specificity (Spec), positive predictive value (PPV), and negative predictive value (NPV) for the event indicator are presented.

| $\beta_z$ | % Cens | $\beta_x$ | $\Delta^*$                                                                   | Sens  | Spec  | PPV   | NPV   |
|-----------|--------|-----------|------------------------------------------------------------------------------|-------|-------|-------|-------|
| log(0.5)  | 90     | log(1.5)  | Bernoulli( $\text{expit}(-1 + 4 * \Delta + 0.5 * X - 0.5 * U - 0.5 * Z)$ )   | 0.718 | 0.961 | 0.665 | 0.969 |
|           |        | log(3)    | Bernoulli( $\text{expit}(-1.5 + 4 * \Delta + 0.5 * X - 0.5 * U - 0.5 * Z)$ ) | 0.715 | 0.970 | 0.710 | 0.971 |

## Appendix C: Multiple Imputation Details

We explicate the multiple imputation implementation details below for imputation models without interaction terms. Define

- $V_i = (1_i, \Delta_i^*, X_i^*, U_i^*, Z_i)'$
- $V_{-U,i} = (1_i, \Delta_i^*, X_i^*, Z_i)'$
- $V_{\Delta,i}^{(l)} = (1_i, \Delta_i^*, \hat{X}_i^{(l-1)}, \hat{U}_i^{(l-1)}, Z_i)$
- $V_{X,i}^{(l)} = (1_i, \hat{\Delta}_i^{(l)}, X_i^*, \hat{U}_i^{(l-1)}, Z_i)$
- $V_{U,i}^{(l)} = (1_i, \hat{\Delta}_i^{(l)}, \hat{X}_i^{(l)}, Z_i)$

and let the lower case versions denote their observed counterparts. MI with interaction terms follows exactly the same except the terms defined above contain all possible interaction terms.

## Multiple imputation for $\Delta$ only

1. Fit the logistic regression model  $\text{logit}(P(\Delta_i = 1)|V_i = v_i) = v_i' \eta$  using the validation subset to obtain  $\hat{\eta}$ . This corresponds to characterizing a posterior distribution for  $\eta$  given the phase two data under a non-informative prior distribution.
2. For  $m = 1, \dots, M$  iterations:
3. Generate  $\eta_\star^{(m)} \sim N(\hat{\eta}, \tau_{\Delta, \star}^2 (V'V)^{-1})$ , where  $\tau_{\Delta, \star}^2 \sim \hat{\tau}_{\Delta}^2 \frac{n-p_\eta}{\chi_{n-p_\eta}^2}$ ,  $\hat{\tau}_{\Delta}^2$  is the squared sum of the working residuals from the logistic regression model, and  $p_\eta$  is the dimension of  $\eta$ .
4. Sample and impute  $\hat{\Delta}_i^{(m)} \sim \text{Bernoulli}(\text{expit}(v_i' \eta_\star^{(m)}))$  for all phase one subjects.
5. Stop after  $M$  iterations

## Fully conditional specification multiple imputation

1. Fit the logistic regression model  $\text{logit}(P(\Delta_i = 1)|V_i = v_i) = v_i' \eta_V$  and linear regression models  $E(X_i|V_i = v_i) = v_i' \theta_V$  and  $E(W_i|V_{-U,i} = v_{-U,i}) = v_{-U,i}' \omega_V$  using the validation subset to obtain  $\hat{\eta}_V$ ,  $\hat{\theta}_V$ , and  $\hat{\omega}_V$ .
2. For  $m = 1, \dots, M$  iterations:
3. Generate  $\eta_\star^{(0)} \sim N(\hat{\eta}_V, \tau_{\Delta, V, \star}^2 (V'V)^{-1})$ ,  $\theta_\star^{(0)} \sim N(\hat{\theta}_V, \tau_{X, V, \star}^2 (V'V)^{-1})$ , and  $\omega_\star^{(0)} \sim N(\hat{\omega}_V, \tau_{U, V, \star}^2 (V_{-U}' V_{-U})^{-1})$  where  $\tau_{\Delta, V, \star}^2 \sim \hat{\tau}_{\Delta, V}^2 \frac{n-p_{\eta_V}}{\chi_{n-p_{\eta_V}}^2}$ ,  $\tau_{X, V, \star}^2 \sim \hat{\tau}_{X, V}^2 \frac{n-p_{\theta_V}}{\chi_{n-p_{\theta_V}}^2}$ ,  $\tau_{U, V, \star}^2 \sim \hat{\tau}_{U, V}^2 \frac{n-p_{\omega_V}}{\chi_{n-p_{\omega_V}}^2}$ ,  $\hat{\tau}_{\Delta, V}^2$ ,  $\hat{\tau}_{X, V}^2$ , and  $\hat{\tau}_{U, V}^2$  are the squared sum of working residuals/residual sum of squares from their respective regression models, and  $p_{\eta_V}$ ,  $p_{\theta_V}$ , and  $p_{\omega_V}$  are the dimensions of their respective parameters.
4. Sample and impute  $\hat{\Delta}_i^{(0)} \sim \text{Bernoulli}(\text{expit}(v_i' \eta_\star^{(0)}))$  and  $\hat{X}_i^{(0)} \sim N(v_i' \theta_\star^{(0)}, \tau_{X, V, \star}^2)$  for all phase one subjects. Sample  $\hat{W}_i^{(0)} \sim N(v_{-U,i}' \omega_\star^{(0)}, \tau_{U, V, \star}^2)$  and impute  $\hat{U}_i^{(0)} = U_i^\star - \hat{W}_i^{(0)}$  for all phase one subjects.
5. For  $l = 1, \dots, L$  iterations:
6. Fit the logistic regression model  $\text{logit}(P(\Delta_i = 1)|V_{\Delta, i}^{(l)} = v_{\Delta, i}^{(l)}) = v_{\Delta, i}^{(l)'} \eta$  on the validation subset to obtain  $\hat{\eta}^{(l)}$ .
7. Generate  $\eta_\star^{(l)} \sim N(\hat{\eta}^{(l)}, \tau_{\Delta, \star}^2 (V_{\Delta}^{(l)'} V_{\Delta}^{(l)})^{-1})$  where  $\tau_{\Delta, \star}^2 \sim \hat{\tau}_{\Delta}^2 \frac{n-p_\eta}{\chi_{n-p_\eta}^2}$ .
8. Sample and impute  $\hat{\Delta}_i^{(l)} \sim \text{Bernoulli}(\text{expit}(v_{\Delta, i}^{(l)'} \eta_\star^{(l)}))$  for all phase one subjects.
9. Fit the linear regression model  $E(X_i|V_{X, i}^{(l)} = v_{X, i}^{(l)}) = v_{X, i}^{(l)'} \theta$  on the validation subset to obtain  $\hat{\theta}^{(l)}$ .
10. Generate  $\theta_\star^{(l)} \sim N(\hat{\theta}^{(l)}, \tau_{X, \star}^2 (V_X^{(l)'} V_X^{(l)})^{-1})$  where  $\tau_{X, \star}^2 \sim \hat{\tau}_X^2 \frac{n-p_\theta}{\chi_{n-p_\theta}^2}$ .
11. Sample and impute  $\hat{X}_i^{(l)} \sim N(v_{X, i}^{(l)'} \theta_\star^{(l)}, \tau_{X, \star}^2)$  for all phase one subjects.
12. Fit the linear regression model  $E(W_i|V_{U, i}^{(l)} = v_{U, i}^{(l)}) = v_{U, i}^{(l)'} \omega$  on the validation subset to obtain  $\hat{\omega}^{(l)}$ .

13. Generate  $\omega_{\star}^{(l)} \sim \mathbf{N}(\hat{\omega}^{(l)}, \tau_{U,\star}^2 (V_U^{(l)'} V_U^{(l)})^{-1})$  where  $\tau_{U,\star}^2 \sim \hat{\tau}_U^2 \frac{n-p_{\omega}}{\chi_{n-p_{\omega}}^2}$ .
14. Sample  $\hat{W}_i^{(l)} \sim \mathbf{N}(v_{U,i}^{(l)'} \omega_{\star}^{(l)}, \tau_{U,\star}^2)$  and impute  $\hat{U}_i^{(l)} = U_i^{\star} - \hat{W}_i^{(l)}$  for all phase one subjects.
15. Stop after  $L$  iterations
16. Stop after  $M$  iterations

## Appendix D: Error scenario 2 - data imputation results

Table 3: Simulation results for estimating  $\beta_x$  using the data imputation approach for error scenario 2 (errors in event indicator and failure time) with  $N = 2000$ ,  $n = 400$ , and simple random sampling. The % bias, empirical standard error (ESE), relative efficiency (RE), average standard error (ASE), mean squared error, and coverage probabilities (CP) are presented for 2000 simulated datasets.

| $\beta_z$ | % Cens   | $\beta_x$ | Method   | % Bias | ESE   | RE    | ASE   | MSE   | CP    |
|-----------|----------|-----------|----------|--------|-------|-------|-------|-------|-------|
| log(0.5)  | 50       | log(1.5)  | True     | 0.077  | 0.040 | 2.322 | 0.039 | 0.002 | 0.950 |
|           |          |           | HT       | 0.863  | 0.092 | 1.000 | 0.088 | 0.008 | 0.937 |
|           |          |           | GRN      | 0.859  | 0.076 | 1.209 | 0.073 | 0.006 | 0.946 |
|           |          |           | GRMIS    | 1.032  | 0.064 | 1.433 | 0.064 | 0.004 | 0.948 |
|           |          |           | GRMIC    | 0.855  | 0.065 | 1.424 | 0.063 | 0.004 | 0.948 |
|           |          |           | GRFCSMIS | 0.853  | 0.063 | 1.454 | 0.064 | 0.004 | 0.950 |
|           |          | GRFCSMIC  | 0.876    | 0.065  | 1.421 | 0.063 | 0.004 | 0.947 |       |
|           |          | log(3)    | True     | -0.008 | 0.042 | 2.366 | 0.044 | 0.002 | 0.951 |
|           |          |           | HT       | 0.449  | 0.099 | 1.000 | 0.098 | 0.010 | 0.942 |
|           |          |           | GRN      | 0.211  | 0.081 | 1.214 | 0.080 | 0.007 | 0.944 |
|           |          |           | GRMIS    | 0.018  | 0.071 | 1.393 | 0.070 | 0.005 | 0.944 |
|           |          |           | GRMIC    | 0.055  | 0.070 | 1.399 | 0.070 | 0.005 | 0.946 |
|           | GRFCSMIS |           | 0.097    | 0.068  | 1.449 | 0.070 | 0.005 | 0.948 |       |
|           | GRFCSMIC | -0.039    | 0.070    | 1.416  | 0.069 | 0.005 | 0.944 |       |       |
|           | 75       | log(1.5)  | True     | -0.112 | 0.051 | 2.511 | 0.053 | 0.003 | 0.946 |
|           |          |           | HT       | 1.593  | 0.127 | 1.000 | 0.119 | 0.016 | 0.938 |
|           |          |           | GRN      | 0.405  | 0.099 | 1.282 | 0.097 | 0.010 | 0.946 |
|           |          |           | GRMIS    | 0.156  | 0.091 | 1.395 | 0.092 | 0.008 | 0.941 |
|           |          |           | GRMIC    | -0.601 | 0.093 | 1.362 | 0.091 | 0.009 | 0.945 |
|           |          |           | GRFCSMIS | -0.270 | 0.092 | 1.388 | 0.092 | 0.008 | 0.942 |
|           |          | GRFCSMIC  | -0.940   | 0.091  | 1.399 | 0.091 | 0.008 | 0.945 |       |
|           |          | log(3)    | True     | -0.018 | 0.058 | 2.372 | 0.059 | 0.003 | 0.948 |
|           |          |           | HT       | 0.564  | 0.138 | 1.000 | 0.132 | 0.019 | 0.938 |
|           |          |           | GRN      | 0.513  | 0.123 | 1.121 | 0.114 | 0.015 | 0.938 |
| GRMIS     |          |           | 0.130    | 0.111  | 1.240 | 0.104 | 0.012 | 0.946 |       |
| GRMIC     |          |           | -0.183   | 0.110  | 1.246 | 0.103 | 0.012 | 0.941 |       |
| GRFCSMIS  | -0.005   |           | 0.109    | 1.259  | 0.104 | 0.012 | 0.942 |       |       |
| GRFCSMIC  | -0.311   | 0.110     | 1.255    | 0.103  | 0.012 | 0.939 |       |       |       |
| 90        | log(1.5) | True      | 0.014    | 0.084  | 2.232 | 0.083 | 0.007 | 0.947 |       |
|           |          | HT        | 1.893    | 0.188  | 1.000 | 0.184 | 0.036 | 0.944 |       |
|           |          | GRN       | 0.748    | 0.168  | 1.123 | 0.166 | 0.028 | 0.940 |       |
|           |          | GRMIS     | 0.393    | 0.161  | 1.171 | 0.159 | 0.026 | 0.929 |       |
|           |          | GRMIC     | 0.502    | 0.163  | 1.157 | 0.157 | 0.027 | 0.928 |       |
|           |          | GRFCSMIS  | 0.250    | 0.161  | 1.170 | 0.160 | 0.026 | 0.933 |       |
|           | GRFCSMIC | 0.861     | 0.163    | 1.154  | 0.157 | 0.027 | 0.930 |       |       |
|           | log(3)   | True      | -0.047   | 0.089  | 2.287 | 0.089 | 0.008 | 0.950 |       |
|           |          | HT        | 1.421    | 0.202  | 1.000 | 0.199 | 0.041 | 0.944 |       |
|           |          | GRN       | 1.283    | 0.189  | 1.073 | 0.189 | 0.036 | 0.946 |       |
|           |          | GRMIS     | 0.120    | 0.177  | 1.143 | 0.176 | 0.031 | 0.944 |       |
|           |          | GRMIC     | -0.272   | 0.176  | 1.153 | 0.174 | 0.031 | 0.938 |       |
| GRFCSMIS  |          | 0.852     | 0.178    | 1.138  | 0.177 | 0.032 | 0.945 |       |       |
| GRFCSMIC  | -0.019   | 0.176     | 1.147    | 0.173  | 0.031 | 0.935 |       |       |       |

## Appendix E: Large cohort simulation results

Table 4: Simulation results for estimating  $\beta_x$  using the data imputation approach for error scenario 1 (error only in event indicator) with  $N = 10000$ ,  $n = 2000$ , and simple random sampling. The % bias, empirical standard error (ESE), relative efficiency (RE), average standard error (ASE), mean squared error, and coverage probabilities (CP) are presented for 2000 simulated datasets.

| $\beta_z$ | % Cens   | $\beta_x$ | Method | % Bias | ESE   | RE    | ASE   | MSE   | CP    |
|-----------|----------|-----------|--------|--------|-------|-------|-------|-------|-------|
| log(0.5)  | 50       | log(1.5)  | True   | 0.055  | 0.017 | 2.362 | 0.018 | 0.000 | 0.951 |
|           |          |           | HT     | -0.027 | 0.041 | 1.000 | 0.039 | 0.002 | 0.958 |
|           |          |           | GRN    | -0.171 | 0.032 | 1.270 | 0.032 | 0.001 | 0.946 |
|           |          |           | GRMIS  | 0.119  | 0.028 | 1.447 | 0.028 | 0.001 | 0.952 |
|           |          |           | GRMIC  | 0.171  | 0.028 | 1.440 | 0.028 | 0.001 | 0.950 |
|           |          |           |        |        |       |       |       |       |       |
|           |          | log(3)    | True   | -0.052 | 0.020 | 2.155 | 0.020 | 0.000 | 0.942 |
|           |          |           | HT     | -0.061 | 0.044 | 1.000 | 0.044 | 0.002 | 0.946 |
|           |          |           | GRN    | -0.099 | 0.039 | 1.143 | 0.036 | 0.001 | 0.945 |
|           |          |           | GRMIS  | -0.081 | 0.031 | 1.413 | 0.031 | 0.001 | 0.946 |
|           |          |           | GRMIC  | -0.133 | 0.031 | 1.429 | 0.031 | 0.001 | 0.948 |
|           |          |           |        |        |       |       |       |       |       |
|           | 75       | log(1.5)  | True   | -0.346 | 0.024 | 2.239 | 0.024 | 0.001 | 0.956 |
|           |          |           | HT     | -0.295 | 0.053 | 1.000 | 0.053 | 0.003 | 0.944 |
|           |          |           | GRN    | -0.239 | 0.043 | 1.235 | 0.043 | 0.002 | 0.943 |
|           |          |           | GRMIS  | -0.307 | 0.042 | 1.263 | 0.041 | 0.002 | 0.954 |
|           |          |           | GRMIC  | -0.111 | 0.043 | 1.224 | 0.041 | 0.002 | 0.949 |
|           |          |           |        |        |       |       |       |       |       |
|           |          | log(3)    | True   | -0.035 | 0.027 | 2.086 | 0.026 | 0.001 | 0.942 |
|           |          |           | HT     | 0.007  | 0.057 | 1.000 | 0.059 | 0.003 | 0.948 |
|           |          |           | GRN    | -0.030 | 0.052 | 1.080 | 0.051 | 0.003 | 0.948 |
|           |          |           | GRMIS  | -0.149 | 0.046 | 1.231 | 0.045 | 0.002 | 0.950 |
|           |          |           | GRMIC  | -0.171 | 0.045 | 1.246 | 0.045 | 0.002 | 0.948 |
|           |          |           |        |        |       |       |       |       |       |
| 90        | log(1.5) | True      | 0.300  | 0.038  | 2.190 | 0.037 | 0.001 | 0.946 |       |
|           |          | HT        | -0.279 | 0.084  | 1.000 | 0.083 | 0.007 | 0.950 |       |
|           |          | GRN       | -0.150 | 0.076  | 1.101 | 0.074 | 0.006 | 0.951 |       |
|           |          | GRMIS     | -0.125 | 0.073  | 1.148 | 0.071 | 0.005 | 0.946 |       |
|           |          | GRMIC     | 0.115  | 0.073  | 1.155 | 0.071 | 0.005 | 0.946 |       |
|           |          |           |        |        |       |       |       |       |       |
|           | log(3)   | True      | -0.108 | 0.040  | 2.205 | 0.040 | 0.002 | 0.948 |       |
|           |          | HT        | -0.033 | 0.088  | 1.000 | 0.089 | 0.008 | 0.952 |       |
|           |          | GRN       | -0.063 | 0.085  | 1.033 | 0.083 | 0.007 | 0.953 |       |
|           |          | GRMIS     | -0.054 | 0.077  | 1.147 | 0.074 | 0.006 | 0.954 |       |
|           |          | GRMIC     | -0.130 | 0.076  | 1.161 | 0.075 | 0.006 | 0.948 |       |
|           |          |           |        |        |       |       |       |       |       |

Table 5: Simulation results for estimating  $\beta_x$  using the data imputation approach for error scenario 2 (errors in event indicator and failure time) with  $N = 10000$ ,  $n = 2000$ , and simple random sampling. The % bias, empirical standard error (ESE), relative efficiency (RE), average standard error (ASE), mean squared error, and coverage probabilities (CP) are presented for 2000 simulated datasets.

| $\beta_z$ | % Cens   | $\beta_x$ | Method   | % Bias | ESE   | RE    | ASE   | MSE   | CP    |
|-----------|----------|-----------|----------|--------|-------|-------|-------|-------|-------|
| log(0.5)  | 50       | log(1.5)  | True     | -0.191 | 0.018 | 2.303 | 0.018 | 0.000 | 0.948 |
|           |          |           | HT       | 0.566  | 0.041 | 1.000 | 0.039 | 0.002 | 0.949 |
|           |          |           | GRN      | -0.000 | 0.033 | 1.224 | 0.033 | 0.001 | 0.958 |
|           |          |           | GRMIS    | -0.100 | 0.029 | 1.411 | 0.028 | 0.001 | 0.952 |
|           |          |           | GRMIC    | 0.058  | 0.028 | 1.434 | 0.028 | 0.001 | 0.950 |
|           |          |           | GRFCSMIS | -0.160 | 0.029 | 1.420 | 0.028 | 0.001 | 0.954 |
|           |          |           | GRFCSMIC | -0.095 | 0.029 | 1.409 | 0.028 | 0.001 | 0.953 |
|           |          | log(3)    | True     | 0.007  | 0.020 | 2.217 | 0.020 | 0.000 | 0.954 |
|           |          |           | HT       | 0.141  | 0.045 | 1.000 | 0.044 | 0.002 | 0.958 |
|           |          |           | GRN      | 0.120  | 0.037 | 1.198 | 0.036 | 0.001 | 0.953 |
|           |          |           | GRMIS    | -0.006 | 0.033 | 1.368 | 0.031 | 0.001 | 0.950 |
|           |          |           | GRMIC    | 0.003  | 0.032 | 1.374 | 0.031 | 0.001 | 0.954 |
|           |          |           | GRFCSMIS | -0.103 | 0.031 | 1.434 | 0.031 | 0.001 | 0.958 |
|           |          |           | GRFCSMIC | 0.022  | 0.032 | 1.399 | 0.031 | 0.001 | 0.950 |
|           | 75       | log(1.5)  | True     | 0.014  | 0.025 | 2.117 | 0.024 | 0.001 | 0.949 |
|           |          |           | HT       | 0.244  | 0.053 | 1.000 | 0.053 | 0.003 | 0.951 |
|           |          |           | GRN      | 0.107  | 0.044 | 1.217 | 0.043 | 0.002 | 0.951 |
|           |          |           | GRMIS    | 0.342  | 0.043 | 1.242 | 0.041 | 0.002 | 0.946 |
|           |          |           | GRMIC    | 0.264  | 0.042 | 1.264 | 0.041 | 0.002 | 0.944 |
|           |          |           | GRFCSMIS | 0.311  | 0.043 | 1.222 | 0.041 | 0.002 | 0.948 |
|           |          |           | GRFCSMIC | 0.286  | 0.042 | 1.248 | 0.041 | 0.002 | 0.944 |
|           |          | log(3)    | True     | -0.057 | 0.028 | 2.082 | 0.026 | 0.001 | 0.946 |
|           |          |           | HT       | 0.080  | 0.059 | 1.000 | 0.059 | 0.003 | 0.958 |
|           |          |           | GRN      | -0.017 | 0.051 | 1.148 | 0.051 | 0.003 | 0.954 |
|           |          |           | GRMIS    | -0.104 | 0.047 | 1.238 | 0.046 | 0.002 | 0.950 |
|           |          |           | GRMIC    | -0.099 | 0.048 | 1.228 | 0.046 | 0.002 | 0.954 |
|           |          |           | GRFCSMIS | -0.134 | 0.046 | 1.260 | 0.046 | 0.002 | 0.954 |
|           |          |           | GRFCSMIC | -0.115 | 0.047 | 1.254 | 0.046 | 0.002 | 0.950 |
| 90        | log(1.5) | True      | 0.300    | 0.038  | 2.093 | 0.037 | 0.001 | 0.946 |       |
|           |          | HT        | 0.614    | 0.080  | 1.000 | 0.083 | 0.006 | 0.944 |       |
|           |          | GRN       | 0.517    | 0.076  | 1.061 | 0.075 | 0.006 | 0.947 |       |
|           |          | GRMIS     | 0.190    | 0.072  | 1.119 | 0.072 | 0.005 | 0.941 |       |
|           |          | GRMIC     | 0.411    | 0.072  | 1.123 | 0.071 | 0.005 | 0.942 |       |
|           |          | GRFCSMIS  | 0.540    | 0.070  | 1.145 | 0.072 | 0.005 | 0.942 |       |
|           |          | GRFCSMIC  | 0.643    | 0.070  | 1.147 | 0.071 | 0.005 | 0.942 |       |
|           | log(3)   | True      | -0.108   | 0.040  | 2.110 | 0.040 | 0.002 | 0.948 |       |
|           |          | HT        | 0.207    | 0.084  | 1.000 | 0.089 | 0.007 | 0.949 |       |
|           |          | GRN       | 0.115    | 0.079  | 1.064 | 0.084 | 0.006 | 0.942 |       |
|           |          | GRMIS     | -0.150   | 0.077  | 1.091 | 0.078 | 0.006 | 0.948 |       |
|           |          | GRMIC     | -0.225   | 0.076  | 1.116 | 0.078 | 0.006 | 0.948 |       |
|           |          | GRFCSMIS  | -0.148   | 0.075  | 1.122 | 0.078 | 0.006 | 0.948 |       |
|           |          | GRFCSMIC  | -0.291   | 0.075  | 1.127 | 0.078 | 0.006 | 0.946 |       |



Table 6: Simulation results for estimating  $\beta_x$  using the data imputation approach for error scenario 3 (errors in event indicator, failure time, and X) with  $N = 10000$ ,  $n = 2000$ , and simple random sampling. The % bias, empirical standard error (ESE), relative efficiency (RE), average standard error (ASE), mean squared error, and coverage probabilities (CP) are presented for 2000 simulated datasets.

| $\beta_z$ | % Cens   | $\beta_x$ | Method   | % Bias | ESE   | RE    | ASE   | MSE   | CP    |
|-----------|----------|-----------|----------|--------|-------|-------|-------|-------|-------|
| log(0.5)  | 50       | log(1.5)  | True     | -0.191 | 0.018 | 2.306 | 0.018 | 0.000 | 0.948 |
|           |          |           | HT       | -0.388 | 0.041 | 1.000 | 0.039 | 0.002 | 0.947 |
|           |          |           | GRN      | -0.065 | 0.040 | 1.009 | 0.039 | 0.002 | 0.949 |
|           |          |           | GRMIS    | -0.407 | 0.040 | 1.012 | 0.039 | 0.002 | 0.943 |
|           |          |           | GRMIC    | -0.423 | 0.040 | 1.013 | 0.039 | 0.002 | 0.944 |
|           |          |           | GRFCSMIS | -0.194 | 0.032 | 1.253 | 0.033 | 0.001 | 0.953 |
|           |          | GRFCSMIC  | -0.208   | 0.033  | 1.230 | 0.033 | 0.001 | 0.950 |       |
|           |          | log(3)    | True     | 0.007  | 0.020 | 2.176 | 0.020 | 0.000 | 0.954 |
|           |          |           | HT       | 0.153  | 0.044 | 1.000 | 0.044 | 0.002 | 0.944 |
|           |          |           | GRN      | 0.183  | 0.044 | 1.000 | 0.044 | 0.002 | 0.938 |
|           |          |           | GRMIS    | 0.140  | 0.043 | 1.010 | 0.044 | 0.002 | 0.944 |
|           |          |           | GRMIC    | 0.131  | 0.043 | 1.011 | 0.044 | 0.002 | 0.945 |
|           | GRFCSMIS |           | 0.084    | 0.039  | 1.108 | 0.039 | 0.002 | 0.946 |       |
|           | GRFCSMIC | 0.082     | 0.040    | 1.095  | 0.039 | 0.002 | 0.944 |       |       |
|           | 75       | log(1.5)  | True     | 0.014  | 0.025 | 2.070 | 0.024 | 0.001 | 0.949 |
|           |          |           | HT       | -0.427 | 0.052 | 1.000 | 0.053 | 0.003 | 0.953 |
|           |          |           | GRN      | -0.089 | 0.050 | 1.028 | 0.052 | 0.003 | 0.952 |
|           |          |           | GRMIS    | -0.192 | 0.052 | 1.002 | 0.053 | 0.003 | 0.950 |
|           |          |           | GRMIC    | -0.142 | 0.052 | 0.998 | 0.053 | 0.003 | 0.950 |
|           |          |           | GRFCSMIS | -0.198 | 0.046 | 1.122 | 0.046 | 0.002 | 0.946 |
|           |          | GRFCSMIC  | 0.056    | 0.046  | 1.128 | 0.046 | 0.002 | 0.942 |       |
|           |          | log(3)    | True     | -0.057 | 0.028 | 2.161 | 0.026 | 0.001 | 0.946 |
|           |          |           | HT       | 0.257  | 0.061 | 1.000 | 0.059 | 0.004 | 0.940 |
|           |          |           | GRN      | 0.304  | 0.061 | 1.002 | 0.058 | 0.004 | 0.939 |
| GRMIS     |          |           | 0.304    | 0.062  | 0.983 | 0.059 | 0.004 | 0.937 |       |
| GRMIC     |          |           | 0.279    | 0.062  | 0.984 | 0.059 | 0.004 | 0.938 |       |
| GRFCSMIS  | 0.247    |           | 0.055    | 1.099  | 0.054 | 0.003 | 0.947 |       |       |
| GRFCSMIC  | 0.162    | 0.054     | 1.115    | 0.054  | 0.003 | 0.942 |       |       |       |
| 90        | log(1.5) | True      | 0.300    | 0.038  | 2.135 | 0.037 | 0.001 | 0.946 |       |
|           |          | HT        | -0.134   | 0.082  | 1.000 | 0.083 | 0.007 | 0.944 |       |
|           |          | GRN       | 0.403    | 0.081  | 1.010 | 0.080 | 0.007 | 0.949 |       |
|           |          | GRMIS     | 0.539    | 0.081  | 1.011 | 0.080 | 0.007 | 0.948 |       |
|           |          | GRMIC     | 0.397    | 0.081  | 1.011 | 0.080 | 0.007 | 0.949 |       |
|           |          | GRFCSMIS  | 0.114    | 0.078  | 1.049 | 0.077 | 0.006 | 0.948 |       |
|           | GRFCSMIC | 0.325     | 0.077    | 1.066  | 0.076 | 0.006 | 0.947 |       |       |
|           | log(3)   | True      | -0.108   | 0.040  | 2.366 | 0.040 | 0.002 | 0.948 |       |
|           |          | HT        | 0.106    | 0.095  | 1.000 | 0.089 | 0.009 | 0.944 |       |
|           |          | GRN       | 0.368    | 0.091  | 1.045 | 0.087 | 0.008 | 0.946 |       |
|           |          | GRMIS     | 0.398    | 0.089  | 1.059 | 0.086 | 0.008 | 0.944 |       |
|           |          | GRMIC     | 0.384    | 0.091  | 1.036 | 0.086 | 0.008 | 0.944 |       |
| GRFCSMIS  |          | 0.205     | 0.088    | 1.079  | 0.085 | 0.008 | 0.943 |       |       |
| GRFCSMIC  | 0.161    | 0.090     | 1.051    | 0.085  | 0.008 | 0.946 |       |       |       |

## Appendix F: Type 1 error results

Table 7: Type 1 error results for  $\beta_x = 0$  using the data imputation approach for error scenario 3 (errors in event indicator, failure time, and X) with  $N = 10000$ ,  $n = 2000$ , and simple random sampling. The absolute bias, empirical standard error (ESE), relative efficiency (RE), average standard error (ASE), mean squared error (MSE), and type 1 error are presented for 2000 simulated datasets.

| $\beta_z$ | % Cens | $\beta_x$ | Method   | Bias   | ESE   | RE    | ASE   | MSE   | Type 1 error |
|-----------|--------|-----------|----------|--------|-------|-------|-------|-------|--------------|
| log(0.5)  | 50     | 0         | True     | 0.001  | 0.044 | 2.193 | 0.043 | 0.002 | 0.052        |
|           |        |           | HT       | 0.002  | 0.097 | 1.000 | 0.096 | 0.009 | 0.052        |
|           |        |           | GRN      | 0.003  | 0.094 | 1.038 | 0.093 | 0.009 | 0.052        |
|           |        |           | GRMIS    | 0.006  | 0.094 | 1.038 | 0.093 | 0.009 | 0.052        |
|           |        |           | GRMIC    | 0.006  | 0.092 | 1.051 | 0.093 | 0.009 | 0.055        |
|           |        |           | GRFCSMIS | 0.004  | 0.090 | 1.084 | 0.090 | 0.008 | 0.052        |
|           |        |           | GRFCSMIC | 0.005  | 0.090 | 1.075 | 0.090 | 0.008 | 0.056        |
|           | 75     | 0         | True     | -0.003 | 0.064 | 2.423 | 0.067 | 0.004 | 0.044        |
|           |        |           | HT       | -0.004 | 0.156 | 1.000 | 0.146 | 0.024 | 0.057        |
|           |        |           | GRN      | 0.001  | 0.154 | 1.014 | 0.145 | 0.024 | 0.060        |
|           |        |           | GRMIS    | -0.000 | 0.152 | 1.027 | 0.144 | 0.023 | 0.060        |
|           |        |           | GRMIC    | -0.002 | 0.155 | 1.009 | 0.144 | 0.024 | 0.064        |
|           |        |           | GRFCSMIS | -0.004 | 0.154 | 1.015 | 0.144 | 0.024 | 0.057        |
|           |        |           | GRFCSMIC | -0.000 | 0.148 | 1.053 | 0.143 | 0.022 | 0.059        |
|           | 90     | 0         | True     | 0.001  | 0.113 | 2.250 | 0.111 | 0.013 | 0.057        |
|           |        |           | HT       | 0.002  | 0.254 | 1.000 | 0.238 | 0.065 | 0.066        |
|           |        |           | GRN      | -0.001 | 0.254 | 0.999 | 0.237 | 0.065 | 0.069        |
|           |        |           | GRMIS    | 0.002  | 0.257 | 0.988 | 0.237 | 0.066 | 0.068        |
|           |        |           | GRMIC    | -0.001 | 0.262 | 0.971 | 0.236 | 0.068 | 0.070        |
|           |        |           | GRFCSMIS | 0.002  | 0.250 | 1.016 | 0.236 | 0.063 | 0.071        |
|           |        |           | GRFCSMIC | -0.005 | 0.244 | 1.042 | 0.234 | 0.059 | 0.072        |

## Appendix G: Influence function imputation results

Table 8: Simulation results for estimating  $\beta_x$  using the IF imputation approach for error scenario 1 (error only in event indicator) with  $N = 2000$ ,  $n = 400$ , and simple random sampling. The % bias, empirical standard error (ESE), relative efficiency (RE), average standard error (ASE), mean squared error, and coverage probabilities (CP) are presented for 2000 simulated datasets.

| $\beta_z$ | % Cens | $\beta_x$ | Method   | % Bias | ESE   | RE    | ASE   | MSE   | CP    |       |
|-----------|--------|-----------|----------|--------|-------|-------|-------|-------|-------|-------|
| log(0.5)  | 50     | log(1.5)  | True     | -0.036 | 0.040 | 2.289 | 0.039 | 0.002 | 0.956 |       |
|           |        |           | HT       | 1.229  | 0.091 | 1.000 | 0.088 | 0.008 | 0.949 |       |
|           |        |           | GRN      | 1.407  | 0.074 | 1.226 | 0.073 | 0.006 | 0.950 |       |
|           |        |           | GRMIS    | -0.902 | 0.065 | 1.397 | 0.065 | 0.004 | 0.946 |       |
|           |        |           | GRMIC    | -1.011 | 0.065 | 1.394 | 0.064 | 0.004 | 0.950 |       |
|           |        |           |          |        |       |       |       |       |       |       |
|           |        | log(3)    | True     | 0.041  | 0.042 | 2.454 | 0.044 | 0.002 | 0.948 |       |
|           |        |           | HT       | 0.631  | 0.102 | 1.000 | 0.098 | 0.010 | 0.939 |       |
|           |        |           | GRN      | 0.282  | 0.083 | 1.236 | 0.080 | 0.007 | 0.942 |       |
|           |        |           | GRMIS    | -0.226 | 0.075 | 1.365 | 0.071 | 0.006 | 0.952 |       |
|           |        |           | GRMIC    | -0.228 | 0.074 | 1.384 | 0.071 | 0.005 | 0.954 |       |
|           |        |           |          |        |       |       |       |       |       |       |
|           |        | 75        | log(1.5) | True   | 0.119 | 0.052 | 2.266 | 0.053 | 0.003 | 0.954 |
|           |        |           |          | HT     | 0.781 | 0.117 | 1.000 | 0.119 | 0.014 | 0.952 |
|           |        |           |          | GRN    | 0.917 | 0.097 | 1.203 | 0.097 | 0.009 | 0.945 |
|           | GRMIS  |           |          | -0.965 | 0.095 | 1.237 | 0.091 | 0.009 | 0.940 |       |
|           | GRMIC  |           |          | -0.552 | 0.096 | 1.224 | 0.091 | 0.009 | 0.940 |       |
|           |        |           |          |        |       |       |       |       |       |       |
|           | log(3) |           | True     | -0.013 | 0.061 | 2.241 | 0.059 | 0.004 | 0.949 |       |
|           |        |           | HT       | 1.035  | 0.136 | 1.000 | 0.131 | 0.019 | 0.938 |       |
|           |        |           | GRN      | 0.386  | 0.119 | 1.144 | 0.114 | 0.014 | 0.934 |       |
|           |        |           | GRMIS    | -0.249 | 0.104 | 1.310 | 0.102 | 0.011 | 0.945 |       |
|           |        |           | GRMIC    | -0.116 | 0.102 | 1.336 | 0.102 | 0.010 | 0.942 |       |
|           |        |           |          |        |       |       |       |       |       |       |
|           | 90     |           | log(1.5) | True   | 0.014 | 0.084 | 2.223 | 0.083 | 0.007 | 0.947 |
|           |        |           |          | HT     | 1.805 | 0.188 | 1.000 | 0.184 | 0.035 | 0.943 |
|           |        |           |          | GRN    | 0.309 | 0.167 | 1.122 | 0.166 | 0.028 | 0.940 |
|           |        | GRMIS     |          | -2.531 | 0.161 | 1.166 | 0.155 | 0.026 | 0.942 |       |
|           |        | GRMIC     |          | -1.376 | 0.162 | 1.160 | 0.153 | 0.026 | 0.933 |       |
|           |        |           |          |        |       |       |       |       |       |       |
| log(3)    |        | True      | -0.047   | 0.089  | 2.316 | 0.089 | 0.008 | 0.950 |       |       |
|           |        | HT        | 1.161    | 0.205  | 1.000 | 0.198 | 0.042 | 0.938 |       |       |
|           |        | GRN       | 0.945    | 0.194  | 1.055 | 0.187 | 0.038 | 0.941 |       |       |
|           |        | GRMIS     | -1.027   | 0.183  | 1.122 | 0.165 | 0.034 | 0.931 |       |       |
|           |        | GRMIC     | -0.949   | 0.179  | 1.147 | 0.163 | 0.032 | 0.924 |       |       |
|           |        |           |          |        |       |       |       |       |       |       |

Table 9: Simulation results for estimating  $\beta_x$  using the IF imputation approach for error scenario 2 (errors in event indicator and failure time) with  $N = 2000$ ,  $n = 400$ , and simple random sampling. The % bias, empirical standard error (ESE), relative efficiency (RE), average standard error (ASE), mean squared error, and coverage probabilities (CP) are presented for 2000 simulated datasets.

| $\beta_z$ | % Cens   | $\beta_x$ | Method   | % Bias | ESE   | RE    | ASE   | MSE   | CP    |
|-----------|----------|-----------|----------|--------|-------|-------|-------|-------|-------|
| log(0.5)  | 50       | log(1.5)  | True     | -0.036 | 0.040 | 2.259 | 0.039 | 0.002 | 0.956 |
|           |          |           | HT       | 1.193  | 0.090 | 1.000 | 0.088 | 0.008 | 0.944 |
|           |          |           | GRN      | 0.369  | 0.074 | 1.214 | 0.073 | 0.005 | 0.940 |
|           |          |           | GRMIS    | -0.669 | 0.068 | 1.321 | 0.064 | 0.005 | 0.950 |
|           |          |           | GRMIC    | -1.174 | 0.067 | 1.327 | 0.064 | 0.005 | 0.947 |
|           |          |           | GRFCSMIS | -0.689 | 0.066 | 1.350 | 0.064 | 0.004 | 0.948 |
|           |          |           | GRFCSMIC | -1.045 | 0.067 | 1.338 | 0.064 | 0.004 | 0.948 |
|           |          | log(3)    | True     | 0.041  | 0.042 | 2.388 | 0.044 | 0.002 | 0.948 |
|           |          |           | HT       | 0.159  | 0.099 | 1.000 | 0.098 | 0.010 | 0.942 |
|           |          |           | GRN      | -0.058 | 0.084 | 1.187 | 0.081 | 0.007 | 0.940 |
|           |          |           | GRMIS    | -0.339 | 0.074 | 1.335 | 0.072 | 0.006 | 0.942 |
|           |          |           | GRMIC    | -0.339 | 0.075 | 1.332 | 0.072 | 0.006 | 0.942 |
|           |          |           | GRFCSMIS | -0.331 | 0.074 | 1.337 | 0.072 | 0.006 | 0.940 |
|           |          |           | GRFCSMIC | -0.418 | 0.072 | 1.371 | 0.071 | 0.005 | 0.941 |
|           | 75       | log(1.5)  | True     | 0.119  | 0.052 | 2.277 | 0.053 | 0.003 | 0.954 |
|           |          |           | HT       | 0.106  | 0.118 | 1.000 | 0.119 | 0.014 | 0.946 |
|           |          |           | GRN      | 0.074  | 0.099 | 1.185 | 0.097 | 0.010 | 0.938 |
|           |          |           | GRMIS    | -1.397 | 0.096 | 1.231 | 0.091 | 0.009 | 0.934 |
|           |          |           | GRMIC    | -2.023 | 0.098 | 1.199 | 0.090 | 0.010 | 0.928 |
|           |          |           | GRFCSMIS | -1.135 | 0.096 | 1.231 | 0.091 | 0.009 | 0.938 |
|           |          |           | GRFCSMIC | -1.805 | 0.096 | 1.220 | 0.091 | 0.009 | 0.929 |
|           |          | log(3)    | True     | -0.013 | 0.061 | 2.183 | 0.059 | 0.004 | 0.949 |
|           |          |           | HT       | 0.359  | 0.133 | 1.000 | 0.132 | 0.018 | 0.946 |
|           |          |           | GRN      | -0.089 | 0.115 | 1.151 | 0.114 | 0.013 | 0.939 |
|           |          |           | GRMIS    | -1.048 | 0.102 | 1.305 | 0.103 | 0.011 | 0.944 |
|           |          |           | GRMIC    | -1.143 | 0.104 | 1.280 | 0.103 | 0.011 | 0.948 |
|           |          |           | GRFCSMIS | -1.180 | 0.101 | 1.316 | 0.103 | 0.010 | 0.943 |
|           |          |           | GRFCSMIC | -1.161 | 0.102 | 1.308 | 0.102 | 0.010 | 0.944 |
| 90        | log(1.5) | True      | 0.014    | 0.084  | 2.241 | 0.083 | 0.007 | 0.947 |       |
|           |          | HT        | -0.122   | 0.189  | 1.000 | 0.185 | 0.036 | 0.940 |       |
|           |          | GRN       | -0.472   | 0.168  | 1.126 | 0.166 | 0.028 | 0.937 |       |
|           |          | GRMIS     | -4.908   | 0.166  | 1.141 | 0.156 | 0.028 | 0.925 |       |
|           |          | GRMIC     | -3.431   | 0.167  | 1.134 | 0.153 | 0.028 | 0.923 |       |
|           |          | GRFCSMIS  | -4.209   | 0.162  | 1.166 | 0.154 | 0.027 | 0.931 |       |
|           |          | GRFCSMIC  | -2.697   | 0.166  | 1.136 | 0.152 | 0.028 | 0.927 |       |
|           | log(3)   | True      | -0.047   | 0.089  | 2.308 | 0.089 | 0.008 | 0.950 |       |
|           |          | HT        | 1.213    | 0.204  | 1.000 | 0.200 | 0.042 | 0.946 |       |
|           |          | GRN       | 1.110    | 0.195  | 1.046 | 0.188 | 0.038 | 0.942 |       |
|           |          | GRMIS     | -1.140   | 0.177  | 1.153 | 0.171 | 0.032 | 0.929 |       |
|           |          | GRMIC     | -1.084   | 0.180  | 1.137 | 0.169 | 0.032 | 0.923 |       |
|           |          | GRFCSMIS  | -1.557   | 0.172  | 1.187 | 0.169 | 0.030 | 0.928 |       |
|           |          | GRFCSMIC  | -0.900   | 0.177  | 1.155 | 0.166 | 0.031 | 0.926 |       |

Table 10: Simulation results for estimating  $\beta_x$  using the IF imputation approach for error scenario 1 (error only in event indicator) with  $N = 10000$ ,  $n = 2000$ , and simple random sampling. The % bias, empirical standard error (ESE), relative efficiency (RE), average standard error (ASE), mean squared error, and coverage probabilities (CP) are presented for 2000 simulated datasets.

| $\beta_z$ | % Cens   | $\beta_x$ | Method | % Bias | ESE   | RE    | ASE   | MSE   | CP    |
|-----------|----------|-----------|--------|--------|-------|-------|-------|-------|-------|
| log(0.5)  | 50       | log(1.5)  | True   | 0.055  | 0.017 | 2.362 | 0.018 | 0.000 | 0.951 |
|           |          |           | HT     | -0.027 | 0.041 | 1.000 | 0.039 | 0.002 | 0.958 |
|           |          |           | GRN    | -0.171 | 0.032 | 1.270 | 0.032 | 0.001 | 0.946 |
|           |          |           | GRMIS  | 0.100  | 0.030 | 1.374 | 0.029 | 0.001 | 0.949 |
|           |          |           | GRMIC  | 0.089  | 0.029 | 1.387 | 0.029 | 0.001 | 0.950 |
|           |          |           |        |        |       |       |       |       |       |
|           | log(3)   | True      | -0.052 | 0.020  | 2.155 | 0.020 | 0.000 | 0.942 |       |
|           |          | HT        | -0.061 | 0.044  | 1.000 | 0.044 | 0.002 | 0.946 |       |
|           |          | GRN       | -0.099 | 0.039  | 1.143 | 0.036 | 0.001 | 0.945 |       |
|           |          | GRMIS     | -0.091 | 0.033  | 1.353 | 0.032 | 0.001 | 0.952 |       |
|           |          | GRMIC     | -0.067 | 0.033  | 1.338 | 0.032 | 0.001 | 0.950 |       |
|           |          |           |        |        |       |       |       |       |       |
|           | 75       | log(1.5)  | True   | -0.346 | 0.024 | 2.239 | 0.024 | 0.001 | 0.956 |
|           |          |           | HT     | -0.295 | 0.053 | 1.000 | 0.053 | 0.003 | 0.944 |
|           |          |           | GRN    | -0.239 | 0.043 | 1.235 | 0.043 | 0.002 | 0.943 |
|           |          |           | GRMIS  | -0.325 | 0.044 | 1.213 | 0.042 | 0.002 | 0.950 |
|           |          |           | GRMIC  | -0.468 | 0.044 | 1.205 | 0.042 | 0.002 | 0.948 |
|           |          |           |        |        |       |       |       |       |       |
| log(3)    |          | True      | -0.035 | 0.027  | 2.086 | 0.026 | 0.001 | 0.942 |       |
|           |          | HT        | 0.007  | 0.057  | 1.000 | 0.059 | 0.003 | 0.948 |       |
|           |          | GRN       | -0.030 | 0.052  | 1.080 | 0.051 | 0.003 | 0.948 |       |
|           |          | GRMIS     | -0.288 | 0.047  | 1.198 | 0.046 | 0.002 | 0.948 |       |
|           |          | GRMIC     | -0.237 | 0.047  | 1.212 | 0.046 | 0.002 | 0.948 |       |
|           |          |           |        |        |       |       |       |       |       |
| 90        | log(1.5) | True      | 0.300  | 0.038  | 2.190 | 0.037 | 0.001 | 0.946 |       |
|           |          | HT        | -0.279 | 0.084  | 1.000 | 0.083 | 0.007 | 0.950 |       |
|           |          | GRN       | -0.150 | 0.076  | 1.101 | 0.074 | 0.006 | 0.951 |       |
|           |          | GRMIS     | -0.382 | 0.076  | 1.108 | 0.073 | 0.006 | 0.947 |       |
|           |          | GRMIC     | -0.479 | 0.075  | 1.124 | 0.072 | 0.006 | 0.946 |       |
|           |          |           |        |        |       |       |       |       |       |
|           | log(3)   | True      | -0.108 | 0.040  | 2.205 | 0.040 | 0.002 | 0.948 |       |
|           |          | HT        | -0.033 | 0.088  | 1.000 | 0.089 | 0.008 | 0.952 |       |
|           |          | GRN       | -0.063 | 0.085  | 1.033 | 0.083 | 0.007 | 0.953 |       |
|           |          | GRMIS     | -0.181 | 0.079  | 1.120 | 0.075 | 0.006 | 0.947 |       |
|           |          | GRMIC     | -0.137 | 0.078  | 1.128 | 0.075 | 0.006 | 0.948 |       |
|           |          |           |        |        |       |       |       |       |       |

Table 11: Simulation results for estimating  $\beta_x$  using the IF imputation approach for error scenario 2 (errors in event indicator and failure time) with  $N = 10000$ ,  $n = 2000$ , and simple random sampling. The % bias, empirical standard error (ESE), relative efficiency (RE), average standard error (ASE), mean squared error, and coverage probabilities (CP) are presented for 2000 simulated datasets.

| $\beta_z$ | % Cens   | $\beta_x$ | Method   | % Bias | ESE    | RE    | ASE   | MSE   | CP    |
|-----------|----------|-----------|----------|--------|--------|-------|-------|-------|-------|
| log(0.5)  | 50       | log(1.5)  | True     | 0.055  | 0.017  | 2.348 | 0.018 | 0.000 | 0.951 |
|           |          |           | HT       | 0.440  | 0.041  | 1.000 | 0.039 | 0.002 | 0.953 |
|           |          |           | GRN      | -0.059 | 0.034  | 1.204 | 0.033 | 0.001 | 0.955 |
|           |          |           | GRMIS    | 0.002  | 0.030  | 1.344 | 0.029 | 0.001 | 0.953 |
|           |          |           | GRMIC    | 0.040  | 0.031  | 1.325 | 0.029 | 0.001 | 0.951 |
|           |          |           | GRFCSMIS | 0.029  | 0.031  | 1.320 | 0.029 | 0.001 | 0.955 |
|           |          |           | GRFCSMIC | 0.001  | 0.031  | 1.320 | 0.029 | 0.001 | 0.956 |
|           |          |           | log(3)   | True   | -0.052 | 0.020 | 2.161 | 0.020 | 0.000 |
|           |          | HT        | 0.062    | 0.044  | 1.000  | 0.044 | 0.002 | 0.951 |       |
|           |          | GRN       | -0.140   | 0.036  | 1.247  | 0.036 | 0.001 | 0.950 |       |
|           |          | GRMIS     | -0.171   | 0.032  | 1.391  | 0.033 | 0.001 | 0.950 |       |
|           |          | GRMIC     | -0.208   | 0.032  | 1.385  | 0.033 | 0.001 | 0.950 |       |
|           |          | GRFCSMIS  | -0.268   | 0.032  | 1.391  | 0.032 | 0.001 | 0.945 |       |
|           |          | GRFCSMIC  | -0.244   | 0.032  | 1.397  | 0.032 | 0.001 | 0.946 |       |
|           | 75       | log(1.5)  | True     | -0.346 | 0.024  | 2.313 | 0.024 | 0.001 | 0.956 |
|           |          |           | HT       | 0.621  | 0.055  | 1.000 | 0.053 | 0.003 | 0.949 |
|           |          |           | GRN      | -0.174 | 0.044  | 1.257 | 0.043 | 0.002 | 0.943 |
|           |          |           | GRMIS    | -0.272 | 0.041  | 1.328 | 0.042 | 0.002 | 0.950 |
|           |          |           | GRMIC    | -0.330 | 0.040  | 1.357 | 0.042 | 0.002 | 0.949 |
|           |          |           | GRFCSMIS | -0.238 | 0.042  | 1.323 | 0.042 | 0.002 | 0.952 |
|           |          |           | GRFCSMIC | -0.353 | 0.041  | 1.350 | 0.042 | 0.002 | 0.951 |
|           |          |           | log(3)   | True   | -0.035 | 0.027 | 2.136 | 0.026 | 0.001 |
|           |          | HT        | 0.174    | 0.058  | 1.000  | 0.059 | 0.003 | 0.948 |       |
|           |          | GRN       | 0.102    | 0.051  | 1.139  | 0.051 | 0.003 | 0.936 |       |
|           |          | GRMIS     | -0.266   | 0.046  | 1.257  | 0.047 | 0.002 | 0.949 |       |
|           |          | GRMIC     | -0.239   | 0.046  | 1.254  | 0.047 | 0.002 | 0.952 |       |
|           |          | GRFCSMIS  | -0.390   | 0.047  | 1.242  | 0.047 | 0.002 | 0.946 |       |
|           |          | GRFCSMIC  | -0.430   | 0.047  | 1.245  | 0.047 | 0.002 | 0.950 |       |
| 90        | log(1.5) | True      | 0.300    | 0.038  | 2.138  | 0.037 | 0.001 | 0.946 |       |
|           |          | HT        | 0.682    | 0.082  | 1.000  | 0.083 | 0.007 | 0.945 |       |
|           |          | GRN       | -0.030   | 0.075  | 1.090  | 0.075 | 0.006 | 0.942 |       |
|           |          | GRMIS     | -0.519   | 0.073  | 1.126  | 0.073 | 0.005 | 0.948 |       |
|           |          | GRMIC     | -0.534   | 0.074  | 1.115  | 0.073 | 0.005 | 0.948 |       |
|           |          | GRFCSMIS  | -0.573   | 0.073  | 1.128  | 0.073 | 0.005 | 0.950 |       |
|           |          | GRFCSMIC  | -0.720   | 0.074  | 1.114  | 0.072 | 0.005 | 0.948 |       |
|           |          | log(3)    | True     | -0.108 | 0.040  | 2.220 | 0.040 | 0.002 | 0.948 |
|           | HT       | 0.172     | 0.089    | 1.000  | 0.089  | 0.008 | 0.946 |       |       |
|           | GRN      | -0.003    | 0.083    | 1.076  | 0.084  | 0.007 | 0.940 |       |       |
|           | GRMIS    | -0.576    | 0.079    | 1.131  | 0.078  | 0.006 | 0.945 |       |       |
|           | GRMIC    | -0.629    | 0.077    | 1.151  | 0.078  | 0.006 | 0.945 |       |       |
|           | GRFCSMIS | -0.689    | 0.077    | 1.151  | 0.077  | 0.006 | 0.942 |       |       |
|           | GRFCSMIC | -0.721    | 0.079    | 1.122  | 0.077  | 0.006 | 0.941 |       |       |

Table 12: Simulation results for estimating  $\beta_x$  using the IF imputation approach for error scenario 3 (errors in event indicator, failure time, and X) with  $N = 10000$ ,  $n = 2000$ , and simple random sampling. The % bias, empirical standard error (ESE), relative efficiency (RE), average standard error (ASE), mean squared error, and coverage probabilities (CP) are presented for 2000 simulated datasets.

| $\beta_z$ | % Cens   | $\beta_x$ | Method   | % Bias | ESE    | RE    | ASE   | MSE   | CP    |
|-----------|----------|-----------|----------|--------|--------|-------|-------|-------|-------|
| log(0.5)  | 50       | log(1.5)  | True     | 0.055  | 0.017  | 2.283 | 0.018 | 0.000 | 0.951 |
|           |          |           | HT       | -0.010 | 0.039  | 1.000 | 0.039 | 0.002 | 0.952 |
|           |          |           | GRN      | 0.521  | 0.039  | 1.005 | 0.039 | 0.002 | 0.950 |
|           |          |           | GRMIS    | -0.232 | 0.040  | 0.990 | 0.038 | 0.002 | 0.939 |
|           |          |           | GRMIC    | -0.350 | 0.040  | 0.998 | 0.038 | 0.002 | 0.938 |
|           |          |           | GRFCSMIS | 0.158  | 0.034  | 1.147 | 0.033 | 0.001 | 0.944 |
|           |          |           | GRFCSMIC | 0.042  | 0.034  | 1.171 | 0.033 | 0.001 | 0.940 |
|           |          |           | log(3)   | True   | -0.052 | 0.020 | 2.194 | 0.020 | 0.000 |
|           |          | HT        | 0.033    | 0.045  | 1.000  | 0.044 | 0.002 | 0.950 |       |
|           |          | GRN       | 0.105    | 0.045  | 1.001  | 0.044 | 0.002 | 0.953 |       |
|           |          | GRMIS     | 0.104    | 0.043  | 1.037  | 0.042 | 0.002 | 0.946 |       |
|           |          | GRMIC     | 0.102    | 0.044  | 1.033  | 0.042 | 0.002 | 0.946 |       |
|           |          | GRFCSMIS  | -0.084   | 0.041  | 1.090  | 0.040 | 0.002 | 0.948 |       |
|           |          | GRFCSMIC  | -0.091   | 0.041  | 1.093  | 0.040 | 0.002 | 0.945 |       |
|           | 75       | log(1.5)  | True     | -0.346 | 0.024  | 2.224 | 0.024 | 0.001 | 0.956 |
|           |          |           | HT       | -0.145 | 0.053  | 1.000 | 0.053 | 0.003 | 0.952 |
|           |          |           | GRN      | 0.489  | 0.052  | 1.006 | 0.052 | 0.003 | 0.950 |
|           |          |           | GRMIS    | 1.163  | 0.052  | 1.023 | 0.050 | 0.003 | 0.948 |
|           |          |           | GRMIC    | 1.205  | 0.052  | 1.010 | 0.050 | 0.003 | 0.946 |
|           |          |           | GRFCSMIS | 0.014  | 0.044  | 1.191 | 0.046 | 0.002 | 0.955 |
|           |          |           | GRFCSMIC | -0.060 | 0.044  | 1.200 | 0.046 | 0.002 | 0.954 |
|           |          |           | log(3)   | True   | -0.035 | 0.027 | 2.195 | 0.026 | 0.001 |
|           |          | HT        | 0.210    | 0.059  | 1.000  | 0.059 | 0.004 | 0.955 |       |
|           |          | GRN       | 0.343    | 0.058  | 1.024  | 0.058 | 0.003 | 0.952 |       |
|           |          | GRMIS     | 0.179    | 0.054  | 1.094  | 0.055 | 0.003 | 0.948 |       |
|           |          | GRMIC     | 0.179    | 0.055  | 1.074  | 0.055 | 0.003 | 0.944 |       |
|           |          | GRFCSMIS  | 0.119    | 0.054  | 1.106  | 0.054 | 0.003 | 0.947 |       |
|           |          | GRFCSMIC  | 0.083    | 0.054  | 1.092  | 0.054 | 0.003 | 0.944 |       |
| 90        | log(1.5) | True      | 0.300    | 0.038  | 2.273  | 0.037 | 0.001 | 0.946 |       |
|           |          | HT        | 0.094    | 0.087  | 1.000  | 0.083 | 0.008 | 0.950 |       |
|           |          | GRN       | 0.391    | 0.084  | 1.038  | 0.080 | 0.007 | 0.950 |       |
|           |          | GRMIS     | 1.613    | 0.083  | 1.047  | 0.077 | 0.007 | 0.940 |       |
|           |          | GRMIC     | 1.605    | 0.083  | 1.050  | 0.077 | 0.007 | 0.938 |       |
|           |          | GRFCSMIS  | 1.233    | 0.078  | 1.112  | 0.077 | 0.006 | 0.946 |       |
|           |          | GRFCSMIC  | 0.715    | 0.080  | 1.090  | 0.077 | 0.006 | 0.944 |       |
|           |          | log(3)    | True     | -0.108 | 0.040  | 2.177 | 0.040 | 0.002 | 0.948 |
|           | HT       | -0.213    | 0.087    | 1.000  | 0.089  | 0.008 | 0.956 |       |       |
|           | GRN      | -0.021    | 0.086    | 1.009  | 0.087  | 0.007 | 0.954 |       |       |
|           | GRMIS    | 0.446     | 0.087    | 0.996  | 0.085  | 0.008 | 0.948 |       |       |
|           | GRMIC    | 0.345     | 0.088    | 0.985  | 0.085  | 0.008 | 0.948 |       |       |
|           | GRFCSMIS | -0.187    | 0.087    | 1.006  | 0.084  | 0.008 | 0.952 |       |       |
|           | GRFCSMIC | -0.126    | 0.087    | 0.996  | 0.083  | 0.008 | 0.945 |       |       |

## Appendix H: Sampling design comparison results

Table 13: Simulation results for estimating  $\beta_x$  using the data imputation approach for error scenario 2 (errors in event indicator and failure time) with  $N = 4000$ ,  $n = 800$  comparing simple random sampling (SRS), case-control sampling (CC), and stratified case-control sampling (SCC). The % bias, empirical standard error (ESE), relative efficiency (RE), average standard error (ASE), mean squared error, and coverage probabilities (CP) are presented for 2000 simulated datasets.

| $\beta_z$ | % Cens   | $\beta_x$ | Design | Method   | % Bias | ESE   | RE       | ASE    | MSE   | CP    |       |       |       |
|-----------|----------|-----------|--------|----------|--------|-------|----------|--------|-------|-------|-------|-------|-------|
| log(0.5)  | 90       | log(1.5)  | SRS    | True     | -0.196 | 0.057 | 2.316    | 0.059  | 0.003 | 0.953 |       |       |       |
|           |          |           |        | HT       | -0.097 | 0.132 | 1.000    | 0.131  | 0.017 | 0.946 |       |       |       |
|           |          |           |        | GRN      | -0.219 | 0.105 | 1.258    | 0.105  | 0.011 | 0.948 |       |       |       |
|           |          |           |        | GRMIS    | -0.459 | 0.105 | 1.249    | 0.104  | 0.011 | 0.946 |       |       |       |
|           |          |           |        | GRMIC    | -0.096 | 0.105 | 1.255    | 0.103  | 0.011 | 0.940 |       |       |       |
|           |          |           |        | GRFCSMIS | -0.283 | 0.105 | 1.256    | 0.104  | 0.011 | 0.946 |       |       |       |
|           |          |           |        | GRFCSMIC | 0.057  | 0.106 | 1.236    | 0.103  | 0.011 | 0.944 |       |       |       |
|           |          |           | CC     | True     | -0.196 | 0.057 | 2.173    | 0.059  | 0.003 | 0.953 |       |       |       |
|           |          |           |        | HT       | 1.443  | 0.123 | 1.000    | 0.120  | 0.015 | 0.936 |       |       |       |
|           |          |           |        | GRN      | 1.055  | 0.108 | 1.140    | 0.106  | 0.012 | 0.934 |       |       |       |
|           |          |           |        | GRMIS    | -0.305 | 0.110 | 1.122    | 0.106  | 0.012 | 0.935 |       |       |       |
|           |          |           |        | GRMIC    | 1.013  | 0.107 | 1.152    | 0.106  | 0.012 | 0.928 |       |       |       |
|           |          |           |        | GRFCSMIS | 0.351  | 0.108 | 1.146    | 0.106  | 0.012 | 0.939 |       |       |       |
|           |          |           |        | GRFCSMIC | -0.051 | 0.110 | 1.122    | 0.106  | 0.012 | 0.930 |       |       |       |
|           |          |           | SCC    | True     | -0.196 | 0.057 | 2.025    | 0.059  | 0.003 | 0.953 |       |       |       |
|           |          |           |        | HT       | 1.542  | 0.115 | 1.000    | 0.109  | 0.013 | 0.942 |       |       |       |
|           |          |           |        | GRN      | 1.334  | 0.104 | 1.108    | 0.100  | 0.011 | 0.934 |       |       |       |
|           |          |           |        | GRMIS    | 1.348  | 0.105 | 1.100    | 0.100  | 0.011 | 0.936 |       |       |       |
|           |          |           |        | GRMIC    | 1.120  | 0.105 | 1.098    | 0.100  | 0.011 | 0.935 |       |       |       |
|           |          |           |        | GRFCSMIS | 1.454  | 0.106 | 1.089    | 0.100  | 0.011 | 0.939 |       |       |       |
|           |          |           |        | GRFCSMIC | 0.827  | 0.104 | 1.105    | 0.100  | 0.011 | 0.934 |       |       |       |
|           |          |           | log(3) |          |        | SRS   | True     | 0.129  | 0.065 | 2.199 | 0.063 | 0.004 | 0.954 |
|           |          |           |        |          |        |       | HT       | 0.164  | 0.143 | 1.000 | 0.140 | 0.020 | 0.946 |
|           |          |           |        |          |        |       | GRN      | 0.046  | 0.120 | 1.187 | 0.115 | 0.014 | 0.943 |
|           |          |           |        |          |        |       | GRMIS    | -0.339 | 0.117 | 1.223 | 0.114 | 0.014 | 0.951 |
|           |          |           |        |          |        |       | GRMIC    | -0.361 | 0.118 | 1.210 | 0.113 | 0.014 | 0.941 |
|           |          |           |        |          |        |       | GRFCSMIS | -0.353 | 0.117 | 1.215 | 0.113 | 0.014 | 0.946 |
| GRFCSMIC  | -0.291   | 0.118     |        |          |        |       | 1.212    | 0.113  | 0.014 | 0.945 |       |       |       |
| CC        | True     | 0.129     |        |          |        | 0.065 | 2.035    | 0.063  | 0.004 | 0.954 |       |       |       |
|           | HT       | 0.864     |        |          |        | 0.132 | 1.000    | 0.130  | 0.018 | 0.930 |       |       |       |
|           | GRN      | 0.906     |        |          |        | 0.118 | 1.115    | 0.113  | 0.014 | 0.930 |       |       |       |
|           | GRMIS    | 0.355     |        |          |        | 0.116 | 1.136    | 0.113  | 0.014 | 0.934 |       |       |       |
|           | GRMIC    | 0.490     |        |          |        | 0.116 | 1.139    | 0.113  | 0.013 | 0.930 |       |       |       |
|           | GRFCSMIS | 0.276     |        |          |        | 0.116 | 1.138    | 0.112  | 0.013 | 0.931 |       |       |       |
|           | GRFCSMIC | 0.282     |        |          |        | 0.117 | 1.128    | 0.112  | 0.014 | 0.930 |       |       |       |
| SCC       | True     | 0.129     |        |          |        | 0.065 | 1.918    | 0.063  | 0.004 | 0.954 |       |       |       |
|           | HT       | 0.744     |        |          |        | 0.124 | 1.000    | 0.120  | 0.016 | 0.938 |       |       |       |
|           | GRN      | 0.857     |        |          |        | 0.112 | 1.112    | 0.109  | 0.013 | 0.940 |       |       |       |
|           | GRMIS    | 0.448     |        |          |        | 0.110 | 1.130    | 0.109  | 0.012 | 0.944 |       |       |       |
|           | GRMIC    | 0.590     |        |          |        | 0.111 | 1.120    | 0.109  | 0.012 | 0.944 |       |       |       |
|           | GRFCSMIS | 0.530     |        |          |        | 0.110 | 1.132    | 0.109  | 0.012 | 0.942 |       |       |       |
|           | GRFCSMIC | 0.279     |        |          |        | 0.111 | 1.125    | 0.108  | 0.012 | 0.940 |       |       |       |



Table 14: Simulation results for estimating  $\beta_x$  using the IF imputation approach for error scenario 2 (errors in event indicator and failure time) with  $N = 4000$ ,  $n = 800$  comparing simple random sampling (SRS), case-control sampling (CC), and stratified case-control sampling (SCC). The % bias, empirical standard error (ESE), relative efficiency (RE), average standard error (ASE), mean squared error, and coverage probabilities (CP) are presented for 2000 simulated datasets.

| $\beta_z$ | % Cens   | $\beta_x$ | Design | Method   | % Bias   | ESE   | RE    | ASE   | MSE   | CP    |       |       |       |
|-----------|----------|-----------|--------|----------|----------|-------|-------|-------|-------|-------|-------|-------|-------|
| log(0.5)  | 90       | log(1.5)  | SRS    | True     | 0.013    | 0.059 | 2.258 | 0.059 | 0.004 | 0.951 |       |       |       |
|           |          |           |        | HT       | 0.591    | 0.134 | 1.000 | 0.131 | 0.018 | 0.940 |       |       |       |
|           |          |           |        | GRN      | 0.764    | 0.109 | 1.228 | 0.104 | 0.012 | 0.940 |       |       |       |
|           |          |           |        | GRMIS    | -1.380   | 0.109 | 1.230 | 0.103 | 0.012 | 0.930 |       |       |       |
|           |          |           |        | GRMIC    | -1.163   | 0.110 | 1.222 | 0.102 | 0.012 | 0.924 |       |       |       |
|           |          |           |        | GRFCSMIS | -1.433   | 0.110 | 1.217 | 0.103 | 0.012 | 0.929 |       |       |       |
|           |          |           |        | GRFCSMIC | -0.970   | 0.112 | 1.195 | 0.102 | 0.013 | 0.926 |       |       |       |
|           |          |           | CC     | True     | 0.013    | 0.059 | 2.086 | 0.059 | 0.004 | 0.951 |       |       |       |
|           |          |           |        | HT       | 3.006    | 0.124 | 1.000 | 0.121 | 0.015 | 0.940 |       |       |       |
|           |          |           |        | GRN      | 2.412    | 0.112 | 1.106 | 0.107 | 0.013 | 0.934 |       |       |       |
|           |          |           |        | GRMIS    | -0.878   | 0.114 | 1.083 | 0.107 | 0.013 | 0.935 |       |       |       |
|           |          |           |        | GRMIC    | -0.092   | 0.120 | 1.032 | 0.107 | 0.014 | 0.922 |       |       |       |
|           |          |           |        | GRFCSMIS | -1.993   | 0.112 | 1.102 | 0.107 | 0.013 | 0.931 |       |       |       |
|           |          |           |        | GRFCSMIC | -0.974   | 0.117 | 1.060 | 0.106 | 0.014 | 0.916 |       |       |       |
|           |          |           | SCC    | True     | 0.013    | 0.059 | 1.909 | 0.059 | 0.004 | 0.951 |       |       |       |
|           |          |           |        | HT       | 0.351    | 0.113 | 1.000 | 0.110 | 0.013 | 0.946 |       |       |       |
|           |          |           |        | GRN      | 0.059    | 0.103 | 1.104 | 0.100 | 0.011 | 0.945 |       |       |       |
|           |          |           |        | GRMIS    | -2.497   | 0.104 | 1.089 | 0.100 | 0.011 | 0.934 |       |       |       |
|           |          |           |        | GRMIC    | -2.394   | 0.103 | 1.105 | 0.099 | 0.011 | 0.931 |       |       |       |
|           |          |           |        | GRFCSMIS | -2.944   | 0.103 | 1.103 | 0.099 | 0.011 | 0.937 |       |       |       |
|           |          |           |        | GRFCSMIC | -2.923   | 0.104 | 1.087 | 0.099 | 0.011 | 0.933 |       |       |       |
|           |          |           | log(3) | 90       | log(1.5) | SRS   | True  | 0.090 | 0.065 | 2.228 | 0.063 | 0.004 | 0.948 |
|           |          |           |        |          |          |       | HT    | 0.988 | 0.145 | 1.000 | 0.141 | 0.021 | 0.942 |
|           |          |           |        |          |          |       | GRN   | 0.463 | 0.114 | 1.273 | 0.115 | 0.013 | 0.947 |
| GRMIS     | -0.886   | 0.113     |        |          |          |       | 1.284 | 0.113 | 0.013 | 0.940 |       |       |       |
| GRMIC     | -1.009   | 0.116     |        |          |          |       | 1.250 | 0.112 | 0.014 | 0.933 |       |       |       |
| GRFCSMIS  | -1.295   | 0.113     |        |          |          |       | 1.292 | 0.111 | 0.013 | 0.940 |       |       |       |
| GRFCSMIC  | -1.211   | 0.114     |        |          |          |       | 1.280 | 0.110 | 0.013 | 0.936 |       |       |       |
| CC        | True     | 0.090     |        |          |          | 0.065 | 2.179 | 0.063 | 0.004 | 0.948 |       |       |       |
|           | HT       | 1.522     |        |          |          | 0.142 | 1.000 | 0.130 | 0.021 | 0.918 |       |       |       |
|           | GRN      | 1.019     |        |          |          | 0.122 | 1.170 | 0.113 | 0.015 | 0.922 |       |       |       |
|           | GRMIS    | -0.356    |        |          |          | 0.126 | 1.132 | 0.111 | 0.016 | 0.911 |       |       |       |
|           | GRMIC    | 0.024     |        |          |          | 0.129 | 1.101 | 0.111 | 0.017 | 0.907 |       |       |       |
|           | GRFCSMIS | -0.509    |        |          |          | 0.121 | 1.178 | 0.110 | 0.015 | 0.919 |       |       |       |
|           | GRFCSMIC | -0.130    |        |          |          | 0.128 | 1.110 | 0.109 | 0.016 | 0.898 |       |       |       |
| SCC       | True     | 0.090     |        |          |          | 0.065 | 2.037 | 0.063 | 0.004 | 0.948 |       |       |       |
|           | HT       | 0.601     |        |          |          | 0.133 | 1.000 | 0.119 | 0.018 | 0.934 |       |       |       |
|           | GRN      | 0.595     |        |          |          | 0.115 | 1.153 | 0.108 | 0.013 | 0.938 |       |       |       |
|           | GRMIS    | -0.588    |        |          |          | 0.113 | 1.180 | 0.106 | 0.013 | 0.942 |       |       |       |
|           | GRMIC    | -0.447    |        |          |          | 0.116 | 1.150 | 0.107 | 0.013 | 0.935 |       |       |       |
|           | GRFCSMIS | -0.970    |        |          |          | 0.113 | 1.174 | 0.106 | 0.013 | 0.934 |       |       |       |
|           | GRFCSMIC | -0.874    |        |          |          | 0.111 | 1.201 | 0.105 | 0.012 | 0.927 |       |       |       |

Table 15: Simulation results for estimating  $\beta_x$  using the IF imputation approach for error scenario 3 (errors in event indicator, failure time, and X) with  $N = 4000$ ,  $n = 800$  comparing simple random sampling (SRS), case-control sampling (CC), and stratified case-control sampling (SCC). The % bias, empirical standard error (ESE), relative efficiency (RE), average standard error (ASE), mean squared error, and coverage probabilities (CP) are presented for 2000 simulated datasets.

| $\beta_z$ | % Cens   | $\beta_x$ | Design | Method   | % Bias | ESE   | RE       | ASE    | MSE   | CP    |       |       |       |
|-----------|----------|-----------|--------|----------|--------|-------|----------|--------|-------|-------|-------|-------|-------|
| log(0.5)  | 90       | log(1.5)  | SRS    | True     | 0.013  | 0.059 | 2.334    | 0.059  | 0.004 | 0.951 |       |       |       |
|           |          |           |        | HT       | 0.645  | 0.139 | 1.000    | 0.130  | 0.019 | 0.948 |       |       |       |
|           |          |           |        | GRN      | 1.081  | 0.125 | 1.106    | 0.120  | 0.016 | 0.951 |       |       |       |
|           |          |           |        | GRMIS    | 3.094  | 0.126 | 1.098    | 0.115  | 0.016 | 0.928 |       |       |       |
|           |          |           |        | GRMIC    | 2.869  | 0.125 | 1.111    | 0.115  | 0.016 | 0.926 |       |       |       |
|           |          |           |        | GRFCSMIS | 0.402  | 0.119 | 1.162    | 0.112  | 0.014 | 0.940 |       |       |       |
|           |          |           |        | GRFCSMIC | 0.595  | 0.121 | 1.147    | 0.111  | 0.015 | 0.939 |       |       |       |
|           |          |           | CC     | True     | 0.013  | 0.059 | 2.113    | 0.059  | 0.004 | 0.951 |       |       |       |
|           |          |           |        | HT       | 1.422  | 0.125 | 1.000    | 0.121  | 0.016 | 0.944 |       |       |       |
|           |          |           |        | GRN      | 1.617  | 0.125 | 1.007    | 0.120  | 0.016 | 0.942 |       |       |       |
|           |          |           |        | GRMIS    | 2.025  | 0.126 | 0.999    | 0.116  | 0.016 | 0.926 |       |       |       |
|           |          |           |        | GRMIC    | 2.742  | 0.130 | 0.965    | 0.115  | 0.017 | 0.919 |       |       |       |
|           |          |           |        | GRFCSMIS | -0.489 | 0.115 | 1.092    | 0.111  | 0.013 | 0.936 |       |       |       |
|           |          |           |        | GRFCSMIC | -0.440 | 0.122 | 1.031    | 0.111  | 0.015 | 0.930 |       |       |       |
|           |          |           | SCC    | True     | 0.013  | 0.059 | 1.850    | 0.059  | 0.004 | 0.951 |       |       |       |
|           |          |           |        | HT       | 0.545  | 0.110 | 1.000    | 0.110  | 0.012 | 0.944 |       |       |       |
|           |          |           |        | GRN      | 1.085  | 0.110 | 0.996    | 0.110  | 0.012 | 0.946 |       |       |       |
|           |          |           |        | GRMIS    | 1.545  | 0.113 | 0.974    | 0.108  | 0.013 | 0.930 |       |       |       |
|           |          |           |        | GRMIC    | 1.326  | 0.114 | 0.963    | 0.108  | 0.013 | 0.930 |       |       |       |
|           |          |           |        | GRFCSMIS | -1.441 | 0.105 | 1.042    | 0.104  | 0.011 | 0.947 |       |       |       |
|           |          |           |        | GRFCSMIC | -0.427 | 0.108 | 1.018    | 0.104  | 0.012 | 0.940 |       |       |       |
|           |          |           | log(3) |          |        | SRS   | True     | 0.090  | 0.065 | 2.211 | 0.063 | 0.004 | 0.948 |
|           |          |           |        |          |        |       | HT       | 0.407  | 0.144 | 1.000 | 0.141 | 0.021 | 0.940 |
|           |          |           |        |          |        |       | GRN      | 0.385  | 0.137 | 1.054 | 0.130 | 0.019 | 0.942 |
|           |          |           |        |          |        |       | GRMIS    | 1.244  | 0.139 | 1.041 | 0.127 | 0.019 | 0.930 |
|           |          |           |        |          |        |       | GRMIC    | 1.307  | 0.140 | 1.029 | 0.127 | 0.020 | 0.930 |
|           |          |           |        |          |        |       | GRFCSMIS | -0.738 | 0.135 | 1.067 | 0.122 | 0.018 | 0.934 |
|           |          |           |        |          |        |       | GRFCSMIC | -0.662 | 0.136 | 1.065 | 0.122 | 0.018 | 0.925 |
| CC        | True     | 0.090     |        |          |        | 0.065 | 2.015    | 0.063  | 0.004 | 0.948 |       |       |       |
|           | HT       | 1.265     |        |          |        | 0.132 | 1.000    | 0.130  | 0.018 | 0.935 |       |       |       |
|           | GRN      | 1.185     |        |          |        | 0.135 | 0.978    | 0.129  | 0.018 | 0.932 |       |       |       |
|           | GRMIS    | 1.728     |        |          |        | 0.134 | 0.979    | 0.127  | 0.018 | 0.924 |       |       |       |
|           | GRMIC    | 1.827     |        |          |        | 0.137 | 0.962    | 0.126  | 0.019 | 0.919 |       |       |       |
|           | GRFCSMIS | -0.358    |        |          |        | 0.132 | 0.997    | 0.121  | 0.017 | 0.921 |       |       |       |
|           | GRFCSMIC | 0.105     |        |          |        | 0.130 | 1.015    | 0.120  | 0.017 | 0.915 |       |       |       |
| SCC       | True     | 0.090     |        |          |        | 0.065 | 1.901    | 0.063  | 0.004 | 0.948 |       |       |       |
|           | HT       | 1.200     |        |          |        | 0.124 | 1.000    | 0.123  | 0.016 | 0.934 |       |       |       |
|           | GRN      | 1.282     |        |          |        | 0.123 | 1.013    | 0.122  | 0.015 | 0.934 |       |       |       |
|           | GRMIS    | 1.169     |        |          |        | 0.125 | 0.991    | 0.121  | 0.016 | 0.932 |       |       |       |
|           | GRMIC    | 1.349     |        |          |        | 0.124 | 1.001    | 0.120  | 0.016 | 0.928 |       |       |       |
|           | GRFCSMIS | -0.738    |        |          |        | 0.123 | 1.013    | 0.117  | 0.015 | 0.930 |       |       |       |
|           | GRFCSMIC | -0.361    |        |          |        | 0.126 | 0.988    | 0.116  | 0.016 | 0.928 |       |       |       |

## Appendix I: Complex misclassification results

Table 16: Misclassification generation process for the simulations testing misclassification generation with interactions. The sensitivity (Sens), specificity (Spec), positive predictive value (PPV), and negative predictive value (NPV) for the event indicator are presented.

| $\Delta^*$                                                                                                                                | % Cens | $\beta_x$ | $\beta_z$ | Sens  | Spec  | PPV   | NPV   |
|-------------------------------------------------------------------------------------------------------------------------------------------|--------|-----------|-----------|-------|-------|-------|-------|
| Bernoulli( $\text{expit}(-1.1 + 0.5 * \Delta - 0.25 * X - 0.1 * U + 0.2 * Z + 0.85 * \Delta * X + 0.2 * \Delta * U + 0.8 * \Delta * z)$ ) | 50     | log(1.5)  | log(0.5)  | 0.833 | 0.889 | 0.860 | 0.867 |
|                                                                                                                                           |        | log(3)    | log(0.5)  | 0.874 | 0.892 | 0.880 | 0.887 |
|                                                                                                                                           | 75     | log(1.5)  | log(0.5)  | 0.768 | 0.818 | 0.573 | 0.917 |
|                                                                                                                                           |        | log(3)    | log(0.5)  | 0.826 | 0.797 | 0.553 | 0.938 |
|                                                                                                                                           | 90     | log(1.5)  | log(0.5)  | 0.709 | 0.734 | 0.224 | 0.959 |
|                                                                                                                                           |        | log(3)    | log(0.5)  | 0.797 | 0.717 | 0.226 | 0.972 |

Table 17: Simulation results for estimating  $\beta_x$  using the data imputation approach for error scenario 3 (errors in event indicator, failure time, and X) with interaction terms in the misclassification generation,  $N = 2000$ ,  $n = 400$ , and simple random sampling. The % bias, empirical standard error (ESE), relative efficiency (RE), average standard error (ASE), mean squared error, and coverage probabilities (CP) are presented for 2000 simulated datasets.

| $\beta_z$ | % Cens   | $\beta_x$ | Method   | % Bias | ESE   | RE    | ASE   | MSE   | CP    |
|-----------|----------|-----------|----------|--------|-------|-------|-------|-------|-------|
| log(0.5)  | 50       | log(1.5)  | True     | -0.036 | 0.040 | 2.358 | 0.039 | 0.002 | 0.956 |
|           |          |           | HT       | 0.969  | 0.093 | 1.000 | 0.088 | 0.009 | 0.944 |
|           |          |           | GRN      | 2.066  | 0.093 | 1.003 | 0.088 | 0.009 | 0.942 |
|           |          |           | GRMIS    | 2.038  | 0.093 | 1.007 | 0.088 | 0.009 | 0.944 |
|           |          |           | GRMIC    | 2.069  | 0.092 | 1.011 | 0.088 | 0.009 | 0.942 |
|           |          |           | GRFCSMIS | 1.111  | 0.070 | 1.339 | 0.071 | 0.005 | 0.954 |
|           |          | GRFCSMIC  | 0.807    | 0.070  | 1.338 | 0.069 | 0.005 | 0.947 |       |
|           |          | log(3)    | True     | 0.041  | 0.042 | 2.491 | 0.044 | 0.002 | 0.948 |
|           |          |           | HT       | 0.313  | 0.104 | 1.000 | 0.098 | 0.011 | 0.942 |
|           |          |           | GRN      | 0.534  | 0.105 | 0.990 | 0.098 | 0.011 | 0.946 |
|           |          |           | GRMIS    | 0.451  | 0.105 | 0.983 | 0.098 | 0.011 | 0.945 |
|           |          |           | GRMIC    | 0.525  | 0.105 | 0.988 | 0.098 | 0.011 | 0.947 |
|           | GRFCSMIS |           | 0.289    | 0.089  | 1.165 | 0.086 | 0.008 | 0.943 |       |
|           | GRFCSMIC | 0.232     | 0.088    | 1.177  | 0.085 | 0.008 | 0.938 |       |       |
|           | 75       | log(1.5)  | True     | 0.119  | 0.052 | 2.317 | 0.053 | 0.003 | 0.954 |
|           |          |           | HT       | 1.004  | 0.120 | 1.000 | 0.119 | 0.014 | 0.948 |
|           |          |           | GRN      | 1.895  | 0.119 | 1.003 | 0.117 | 0.014 | 0.949 |
|           |          |           | GRMIS    | 2.028  | 0.121 | 0.993 | 0.118 | 0.015 | 0.950 |
|           |          |           | GRMIC    | 2.267  | 0.121 | 0.987 | 0.117 | 0.015 | 0.949 |
|           |          |           | GRFCSMIS | 0.288  | 0.100 | 1.203 | 0.104 | 0.010 | 0.952 |
|           |          | GRFCSMIC  | 0.812    | 0.099  | 1.209 | 0.102 | 0.010 | 0.946 |       |
|           |          | log(3)    | True     | -0.013 | 0.061 | 2.250 | 0.059 | 0.004 | 0.949 |
|           |          |           | HT       | 0.836  | 0.137 | 1.000 | 0.131 | 0.019 | 0.952 |
|           |          |           | GRN      | 1.165  | 0.134 | 1.020 | 0.130 | 0.018 | 0.950 |
| GRMIS     |          |           | 1.065    | 0.137  | 1.002 | 0.131 | 0.019 | 0.950 |       |
| GRMIC     |          |           | 1.028    | 0.136  | 1.007 | 0.131 | 0.019 | 0.952 |       |
| GRFCSMIS  | 0.640    |           | 0.124    | 1.108  | 0.122 | 0.015 | 0.949 |       |       |
| GRFCSMIC  | 0.475    | 0.122     | 1.126    | 0.121  | 0.015 | 0.944 |       |       |       |
| 90        | log(1.5) | True      | 0.014    | 0.084  | 2.252 | 0.083 | 0.007 | 0.947 |       |
|           |          | HT        | 1.898    | 0.190  | 1.000 | 0.183 | 0.036 | 0.940 |       |
|           |          | GRN       | 1.972    | 0.189  | 1.003 | 0.180 | 0.036 | 0.940 |       |
|           |          | GRMIS     | 2.311    | 0.190  | 1.001 | 0.180 | 0.036 | 0.948 |       |
|           |          | GRMIC     | 2.802    | 0.187  | 1.017 | 0.178 | 0.035 | 0.940 |       |
|           |          | GRFCSMIS  | -0.059   | 0.185  | 1.029 | 0.174 | 0.034 | 0.940 |       |
|           | GRFCSMIC | -0.060    | 0.184    | 1.032  | 0.172 | 0.034 | 0.934 |       |       |
|           | log(3)   | True      | -0.047   | 0.089  | 2.349 | 0.089 | 0.008 | 0.950 |       |
|           |          | HT        | 0.929    | 0.208  | 1.000 | 0.197 | 0.043 | 0.939 |       |
|           |          | GRN       | 0.856    | 0.205  | 1.015 | 0.194 | 0.042 | 0.938 |       |
|           |          | GRMIS     | 1.024    | 0.206  | 1.012 | 0.193 | 0.042 | 0.939 |       |
|           |          | GRMIC     | 1.051    | 0.203  | 1.023 | 0.191 | 0.041 | 0.937 |       |
| GRFCSMIS  |          | 0.820     | 0.201    | 1.033  | 0.191 | 0.041 | 0.933 |       |       |
| GRFCSMIC  | 0.472    | 0.198     | 1.050    | 0.189  | 0.039 | 0.935 |       |       |       |

Table 18: Simulation results for estimating  $\beta_x$  using the IF imputation approach for error scenario 3 (errors in event indicator, failure time, and X) with interaction terms in the misclassification generation,  $N = 2000$ ,  $n = 400$ , and simple random sampling. The % bias, empirical standard error (ESE), relative efficiency (RE), average standard error (ASE), mean squared error, and coverage probabilities (CP) are presented for 2000 simulated datasets.

| $\beta_z$ | % Cens   | $\beta_x$ | Method   | % Bias | ESE   | RE    | ASE   | MSE   | CP    |
|-----------|----------|-----------|----------|--------|-------|-------|-------|-------|-------|
| log(0.5)  | 50       | log(1.5)  | True     | -0.036 | 0.040 | 2.358 | 0.039 | 0.002 | 0.956 |
|           |          |           | HT       | 0.969  | 0.093 | 1.000 | 0.088 | 0.009 | 0.944 |
|           |          |           | GRN      | 2.066  | 0.093 | 1.003 | 0.088 | 0.009 | 0.942 |
|           |          |           | GRMIS    | 1.470  | 0.094 | 0.996 | 0.082 | 0.009 | 0.914 |
|           |          |           | GRMIC    | 0.961  | 0.093 | 1.004 | 0.082 | 0.009 | 0.920 |
|           |          |           | GRFCSMIS | -0.018 | 0.070 | 1.332 | 0.069 | 0.005 | 0.944 |
|           |          | GRFCSMIC  | -0.278   | 0.070  | 1.341 | 0.069 | 0.005 | 0.942 |       |
|           |          | log(3)    | True     | 0.041  | 0.042 | 2.491 | 0.044 | 0.002 | 0.948 |
|           |          |           | HT       | 0.313  | 0.104 | 1.000 | 0.098 | 0.011 | 0.942 |
|           |          |           | GRN      | 0.534  | 0.105 | 0.990 | 0.098 | 0.011 | 0.946 |
|           |          |           | GRMIS    | 1.800  | 0.104 | 0.999 | 0.092 | 0.011 | 0.927 |
|           |          |           | GRMIC    | 1.777  | 0.103 | 1.009 | 0.092 | 0.011 | 0.925 |
|           | GRFCSMIS |           | -0.134   | 0.096  | 1.082 | 0.084 | 0.009 | 0.934 |       |
|           | GRFCSMIC | -0.288    | 0.095    | 1.095  | 0.084 | 0.009 | 0.932 |       |       |
|           | 75       | log(1.5)  | True     | 0.119  | 0.052 | 2.317 | 0.053 | 0.003 | 0.954 |
|           |          |           | HT       | 1.004  | 0.120 | 1.000 | 0.119 | 0.014 | 0.948 |
|           |          |           | GRN      | 1.895  | 0.119 | 1.003 | 0.117 | 0.014 | 0.949 |
|           |          |           | GRMIS    | 3.458  | 0.120 | 0.996 | 0.107 | 0.015 | 0.926 |
|           |          |           | GRMIC    | 3.698  | 0.120 | 0.999 | 0.106 | 0.015 | 0.924 |
|           |          |           | GRFCSMIS | 0.701  | 0.105 | 1.146 | 0.101 | 0.011 | 0.947 |
|           |          | GRFCSMIC  | 0.954    | 0.104  | 1.155 | 0.100 | 0.011 | 0.943 |       |
|           |          | log(3)    | True     | -0.013 | 0.061 | 2.250 | 0.059 | 0.004 | 0.949 |
|           |          |           | HT       | 0.836  | 0.137 | 1.000 | 0.131 | 0.019 | 0.952 |
|           |          |           | GRN      | 1.165  | 0.134 | 1.020 | 0.130 | 0.018 | 0.950 |
| GRMIS     |          |           | 1.141    | 0.134  | 1.026 | 0.121 | 0.018 | 0.931 |       |
| GRMIC     |          |           | 1.082    | 0.135  | 1.017 | 0.121 | 0.018 | 0.933 |       |
| GRFCSMIS  | -0.384   |           | 0.127    | 1.074  | 0.117 | 0.016 | 0.934 |       |       |
| GRFCSMIC  | -0.253   | 0.125     | 1.095    | 0.117  | 0.016 | 0.930 |       |       |       |
| 90        | log(1.5) | True      | 0.014    | 0.084  | 2.252 | 0.083 | 0.007 | 0.947 |       |
|           |          | HT        | 1.898    | 0.190  | 1.000 | 0.183 | 0.036 | 0.940 |       |
|           |          | GRN       | 1.972    | 0.189  | 1.003 | 0.180 | 0.036 | 0.940 |       |
|           |          | GRMIS     | 8.575    | 0.208  | 0.915 | 0.168 | 0.044 | 0.902 |       |
|           |          | GRMIC     | 8.465    | 0.199  | 0.953 | 0.165 | 0.041 | 0.892 |       |
|           |          | GRFCSMIS  | 4.651    | 0.183  | 1.036 | 0.165 | 0.034 | 0.925 |       |
|           | GRFCSMIC | 4.944     | 0.182    | 1.043  | 0.162 | 0.034 | 0.910 |       |       |
|           | log(3)   | True      | -0.047   | 0.089  | 2.349 | 0.089 | 0.008 | 0.950 |       |
|           |          | HT        | 0.929    | 0.208  | 1.000 | 0.197 | 0.043 | 0.939 |       |
|           |          | GRN       | 0.856    | 0.205  | 1.015 | 0.194 | 0.042 | 0.938 |       |
|           |          | GRMIS     | 4.226    | 0.205  | 1.016 | 0.184 | 0.044 | 0.916 |       |
|           |          | GRMIC     | 4.046    | 0.206  | 1.010 | 0.182 | 0.044 | 0.915 |       |
| GRFCSMIS  |          | 1.593     | 0.196    | 1.063  | 0.179 | 0.039 | 0.911 |       |       |
| GRFCSMIC  | 1.238    | 0.202     | 1.031    | 0.177  | 0.041 | 0.908 |       |       |       |

## Appendix J: Misspecified imputation model results

Table 19: Simulation results for estimating  $\beta_x$  using the IF imputation approach for error scenario 3 (errors in event indicator, failure time, and X) with misspecified imputation models,  $N = 2000$ ,  $n = 400$ , and simple random sampling.  $\Delta^*$  was generated as  $\text{Bernoulli}(\text{expit}(3 \times \Delta - (0.75 \times \sin(\pi \times X)) - \exp(0.2 \times U) + (0.5 \times Z)^5))$  and  $X^*$  was generated as  $0.2 + X^3 + (2 \times (1 - Z))^4 - 0.4 \times \Delta - (0.25 \times \sin(\pi \times U)) + \epsilon$ . The % bias, empirical standard error (ESE), relative efficiency (RE), average standard error (ASE), mean squared error, and coverage probabilities (CP) are presented for 2000 simulated datasets.

| $\beta_z$ | % Cens   | $\beta_x$ | Method   | % Bias | ESE   | RE    | ASE   | MSE   | CP    |
|-----------|----------|-----------|----------|--------|-------|-------|-------|-------|-------|
| log(0.5)  | 50       | log(1.5)  | True     | -0.036 | 0.040 | 2.174 | 0.039 | 0.002 | 0.956 |
|           |          |           | HT       | 1.949  | 0.086 | 1.000 | 0.088 | 0.007 | 0.951 |
|           |          |           | GRN      | 1.847  | 0.088 | 0.984 | 0.088 | 0.008 | 0.950 |
|           |          |           | GRMIS    | 1.693  | 0.086 | 1.006 | 0.088 | 0.007 | 0.949 |
|           |          |           | GRMIC    | 1.589  | 0.086 | 0.999 | 0.088 | 0.007 | 0.951 |
|           |          |           | GRFCSMIS | 1.615  | 0.087 | 0.990 | 0.088 | 0.008 | 0.949 |
|           |          |           | GRFCSMIC | 1.179  | 0.088 | 0.982 | 0.087 | 0.008 | 0.946 |
|           |          | log(3)    | True     | 0.041  | 0.042 | 2.323 | 0.044 | 0.002 | 0.948 |
|           |          |           | HT       | 0.384  | 0.097 | 1.000 | 0.098 | 0.009 | 0.952 |
|           |          |           | GRN      | 0.363  | 0.098 | 0.988 | 0.098 | 0.010 | 0.952 |
|           |          |           | GRMIS    | 0.338  | 0.098 | 0.988 | 0.098 | 0.010 | 0.953 |
|           |          |           | GRMIC    | 0.379  | 0.097 | 0.992 | 0.098 | 0.010 | 0.952 |
|           |          |           | GRFCSMIS | 0.442  | 0.098 | 0.986 | 0.097 | 0.010 | 0.954 |
|           |          |           | GRFCSMIC | -0.285 | 0.095 | 1.012 | 0.097 | 0.009 | 0.947 |
|           | 75       | log(1.5)  | True     | 0.119  | 0.052 | 2.376 | 0.053 | 0.003 | 0.955 |
|           |          |           | HT       | 0.207  | 0.123 | 1.000 | 0.119 | 0.015 | 0.951 |
|           |          |           | GRN      | 0.636  | 0.121 | 1.015 | 0.119 | 0.015 | 0.952 |
|           |          |           | GRMIS    | 0.224  | 0.121 | 1.014 | 0.119 | 0.015 | 0.950 |
|           |          |           | GRMIC    | 0.352  | 0.122 | 1.003 | 0.119 | 0.015 | 0.951 |
|           |          |           | GRFCSMIS | 0.333  | 0.121 | 1.017 | 0.118 | 0.015 | 0.950 |
|           |          |           | GRFCSMIC | 0.315  | 0.121 | 1.013 | 0.118 | 0.015 | 0.950 |
|           |          | log(3)    | True     | -0.013 | 0.061 | 2.328 | 0.059 | 0.004 | 0.949 |
|           |          |           | HT       | 0.778  | 0.142 | 1.000 | 0.132 | 0.020 | 0.952 |
|           |          |           | GRN      | 0.870  | 0.142 | 1.001 | 0.131 | 0.020 | 0.953 |
|           |          |           | GRMIS    | 0.899  | 0.140 | 1.012 | 0.132 | 0.020 | 0.950 |
|           |          |           | GRMIC    | 0.916  | 0.142 | 1.002 | 0.131 | 0.020 | 0.951 |
|           |          |           | GRFCSMIS | 0.880  | 0.141 | 1.006 | 0.131 | 0.020 | 0.952 |
|           |          |           | GRFCSMIC | 0.576  | 0.141 | 1.003 | 0.131 | 0.020 | 0.953 |
| 90        | log(1.5) | True      | 0.014    | 0.084  | 2.243 | 0.083 | 0.007 | 0.947 |       |
|           |          | HT        | 1.454    | 0.189  | 1.000 | 0.183 | 0.036 | 0.942 |       |
|           |          | GRN       | 1.117    | 0.187  | 1.010 | 0.184 | 0.035 | 0.944 |       |
|           |          | GRMIS     | 1.068    | 0.188  | 1.006 | 0.183 | 0.035 | 0.942 |       |
|           |          | GRMIC     | 0.997    | 0.188  | 1.007 | 0.184 | 0.035 | 0.940 |       |
|           |          | GRFCSMIS  | 0.528    | 0.188  | 1.007 | 0.183 | 0.035 | 0.942 |       |
|           |          | GRFCSMIC  | 0.956    | 0.184  | 1.028 | 0.183 | 0.034 | 0.938 |       |
|           | log(3)   | True      | -0.047   | 0.089  | 2.365 | 0.089 | 0.008 | 0.951 |       |
|           |          | HT        | 0.755    | 0.209  | 1.000 | 0.198 | 0.044 | 0.941 |       |
|           |          | GRN       | 0.743    | 0.210  | 0.996 | 0.197 | 0.044 | 0.936 |       |
|           |          | GRMIS     | 0.664    | 0.209  | 1.004 | 0.198 | 0.044 | 0.935 |       |
|           |          | GRMIC     | 0.621    | 0.211  | 0.995 | 0.198 | 0.044 | 0.936 |       |
|           |          | GRFCSMIS  | 0.636    | 0.209  | 1.004 | 0.197 | 0.044 | 0.939 |       |
|           |          | GRFCSMIC  | 0.563    | 0.207  | 1.013 | 0.198 | 0.043 | 0.937 |       |

## Appendix K: VCCC analysis details

For this study, we analyzed data on 4797 HIV-positive patients that had been fully validated and applied some common inclusion/exclusion criteria used in HIV studies to obtain the final analysis dataset. Specifically, any patients that had an indeterminate ART start date, no CD4 count measurement between 180 days before or 30 days after starting ART, no follow-up visits in the clinic after starting ART, an ADE before starting ART, or an indeterminate ADE date were excluded. In addition, patients must have been at least 18 years of age at ART start and not started ART prior to enrollment. Lastly, any ADE within 6 months of starting ART were not considered a true failure due to the time required for ART to be efficacious. After application of these criteria, the unvalidated and validated data contained 1995 and 1595 patients, respectively. The 1595 patients that met the criteria in the validated dataset were used for the analysis of the ADE outcome.

The censoring rate among the 1595 patients was very high at 93.8%, suggesting that an outcome-dependent sampling design that oversamples cases would be necessary. Of the 1595 patients, 11% had a misclassified ADE; specifically, 161 were incorrectly classified as having an ADE and 12 were incorrectly classified as having been censored. For the failure times, 34.5% were incorrect, with the errors having mean and standard deviation of  $-0.75$  and  $2.89$  years, respectively. There were errors in the CD4 count at ART start for only 6.7% of the patients; however, the errors were right skewed, having mean and standard deviation of 10 and  $154 \text{ cell/mm}^3$ , respectively. In addition, the errors in the failure times and CD4 count at ART start had a correlation of  $-0.10$ .

Table 20: The median hazard ratios (HR) and their corresponding 95% confidence interval widths calculated using the IF imputation method from 100 different sampled validation subsets for a 100 cell/mm<sup>3</sup> increase in CD4 count at ART initiation and 10-year increase in age at CD4 count measurement.

| Subset size | Sampling | Method   | CD4 HR | CD4 CI width | Age HR | Age CI width |       |
|-------------|----------|----------|--------|--------------|--------|--------------|-------|
| 340         | CC       | True     | 0.693  | 0.190        | 0.829  | 0.361        |       |
|             |          | Naive    | 0.91   | 0.125        | 1.087  | 0.275        |       |
|             |          | HT       | 0.677  | 0.323        | 0.805  | 0.576        |       |
|             |          | GRN      | 0.68   | 0.284        | 0.821  | 0.477        |       |
|             |          | GRMIS    | 0.704  | 0.323        | 0.807  | 0.526        |       |
|             |          | GRMIC    | 0.695  | 0.296        | 0.804  | 0.492        |       |
|             |          | GRFCSMIS | 0.69   | 0.307        | 0.813  | 0.488        |       |
|             |          | GRFCSMIC | 0.684  | 0.299        | 0.813  | 0.463        |       |
|             | SCCB     | True     | 0.693  | 0.190        | 0.829  | 0.361        |       |
|             |          | Naive    | 0.91   | 0.125        | 1.087  | 0.275        |       |
|             |          | HT       | 0.682  | 0.283        | 0.855  | 0.571        |       |
|             |          | GRN      | 0.682  | 0.278        | 0.835  | 0.497        |       |
|             |          | GRMIS    | 0.691  | 0.284        | 0.851  | 0.515        |       |
|             |          | GRMIC    | 0.691  | 0.277        | 0.861  | 0.499        |       |
|             |          | GRFCSMIS | 0.7    | 0.289        | 0.846  | 0.506        |       |
|             |          | GRFCSMIC | 0.702  | 0.282        | 0.848  | 0.490        |       |
|             | SCCN     | True     | 0.693  | 0.190        | 0.829  | 0.361        |       |
|             |          | Naive    | 0.91   | 0.125        | 1.087  | 0.275        |       |
|             |          | HT       | 0.694  | 0.310        | 0.829  | 0.702        |       |
|             |          | GRN      | 0.69   | 0.304        | 0.813  | 0.609        |       |
|             |          | GRMIS    | 0.711  | 0.303        | 0.820  | 0.583        |       |
|             |          | GRMIC    | 0.715  | 0.298        | 0.824  | 0.570        |       |
|             |          | GRFCSMIS | 0.708  | 0.301        | 0.838  | 0.566        |       |
|             |          | GRFCSMIC | 0.723  | 0.298        | 0.826  | 0.561        |       |
|             | 680      | CC       | True   | 0.693        | 0.190  | 0.829        | 0.361 |
|             |          |          | Naive  | 0.91         | 0.125  | 1.087        | 0.275 |
|             |          |          | HT     | 0.691        | 0.237  | 0.839        | 0.411 |
|             |          |          | GRN    | 0.69         | 0.227  | 0.830        | 0.386 |
| GRMIS       |          |          | 0.696  | 0.234        | 0.829  | 0.391        |       |
| GRMIC       |          |          | 0.7    | 0.232        | 0.834  | 0.385        |       |
| GRFCSMIS    |          |          | 0.696  | 0.232        | 0.832  | 0.388        |       |
| GRFCSMIC    |          |          | 0.702  | 0.230        | 0.830  | 0.386        |       |
| SCCB        |          | True     | 0.693  | 0.190        | 0.829  | 0.361        |       |
|             |          | Naive    | 0.91   | 0.125        | 1.087  | 0.275        |       |
|             |          | HT       | 0.688  | 0.228        | 0.828  | 0.413        |       |
|             |          | GRN      | 0.69   | 0.227        | 0.821  | 0.387        |       |
|             |          | GRMIS    | 0.694  | 0.230        | 0.831  | 0.398        |       |
|             |          | GRMIC    | 0.697  | 0.229        | 0.830  | 0.390        |       |
|             |          | GRFCSMIS | 0.698  | 0.230        | 0.826  | 0.393        |       |
|             |          | GRFCSMIC | 0.7    | 0.231        | 0.824  | 0.388        |       |
| SCCN        |          | True     | 0.693  | 0.190        | 0.829  | 0.361        |       |
|             |          | Naive    | 0.91   | 0.125        | 1.087  | 0.275        |       |
|             |          | HT       | 0.688  | 0.231        | 0.832  | 0.438        |       |
|             |          | GRN      | 0.687  | 0.231        | 0.832  | 0.409        |       |
|             |          | GRMIS    | 0.693  | 0.232        | 0.825  | 0.407        |       |
|             |          | GRMIC    | 0.694  | 0.231        | 0.825  | 0.402        |       |
|             |          | GRFCSMIS | 0.694  | 0.233        | 0.823  | 0.402        |       |
|             |          | GRFCSMIC | 0.698  | 0.233        | 0.828  | 0.400        |       |



## References

- Deville, J. C. and Särndal, C. E. (1992). Calibration estimators in survey sampling. *Journal of the American Statistical Association* **87**, 376–382.
- Saegusa, T. and Wellner, J. A. (2013). Weighted likelihood estimation under two-phase sampling. *Annals of Statistics* **41**, 269–295.
- Van der Vaart, A. W. (2000). *Asymptotic Statistics*, volume 3. Cambridge university press.
